1  
2  
3  
4  
5  
6  
7  
8  
9  
10  
11  
12  
13  
14  
15  
16  
17  
18  
19  
20  
21  
22  
23  
24  
25  
26  
27  
28  
29  
30  
31  
32  
33  
34

**The nanoscale organization of the Wnt signaling integrator Dishevelled in the development-essential vegetal cortex domain of an egg and early embryo**

John H. Henson<sup>1,2\*</sup>, Bakary Samasa<sup>1,2</sup>, Charles B. Shuster<sup>2,3</sup>, and Athula H. Wikramanayake<sup>4</sup>

<sup>1</sup>Department of Biology, Dickinson College, Carlisle, Pennsylvania, United States of America

<sup>2</sup>Friday Harbor Laboratories, University of Washington, Friday Harbor, Washington, United States of America

<sup>3</sup>Department of Biology, New Mexico State University, Las Cruces, New Mexico, United States of America

<sup>4</sup>Department of Biology, University of Miami, Coral Gables, Florida, United States of America

\* Corresponding author

E-mail: [henson@dickinson.edu](mailto:henson@dickinson.edu) (JHH)

## 35 **Abstract**

36 Wnt/ $\beta$ -catenin (cWnt) signaling is a crucial regulator of development and Dishevelled (Dsh/Dvl)  
37 functions as an integral part of this pathway by linking Wnt binding to the frizzled:LRP5/6  
38 receptor complex with  $\beta$ -catenin-stimulated gene expression. In many cell types Dsh has been  
39 localized to ill-defined cytoplasmic puncta, however in sea urchin eggs and embryos confocal  
40 fluorescence microscopy has shown that Dsh is localized to puncta present in a novel and  
41 development-essential vegetal cortex domain (VCD). In the present study, we used super-  
42 resolution light microscopy and platinum replica TEM to provide the first views of the  
43 ultrastructural organization of Dsh within the sea urchin VCD. 3D-SIM imaging of isolated egg  
44 cortices demonstrated the concentration gradient-like distribution of Dsh in the VCD, whereas  
45 higher resolution STED imaging revealed that some individual Dsh puncta consisted of more  
46 than one fluorescent source. Platinum replica immuno-TEM localization showed that Dsh  
47 puncta on the cytoplasmic face of the plasma membrane consisted of aggregates of pedestal-  
48 like structures each individually labeled with the C-terminus specific Dsh antibody. These  
49 aggregates were resistant to detergent extraction and treatment with drugs that disrupt actin  
50 filaments or inhibit myosin II contraction, and coexisted with the first division actomyosin  
51 contractile ring. These results confirm and extend previous studies and reveal, for the first time  
52 in any cell type, the nanoscale organization of plasma membrane tethered Dsh. Our current  
53 working hypothesis is that these Dsh pedestals represent a prepositioned scaffold organization  
54 that is important for canonical Wnt pathway activation at the sea urchin vegetal organization and  
55 may also be relevant to the submembranous Dsh puncta present in other eggs and embryos.

56  
57

## 58 **Introduction**

59 Wnt signaling controls a broad range of fundamental processes in cell and developmental  
60 biology including embryonic axis specification, and cell, tissue and organ morphogenesis and  
61 homeostasis [1]. Dishevelled (Dsh/Dvl) is a central integrator of the three main Wnt signaling  
62 pathways - the canonical Wnt/ $\beta$ -catenin pathway which drives cell specification, and the non-  
63 canonical Wnt/planar cell polarity and Wnt/ $\text{Ca}^{2+}$  pathways controlling cellular morphogenesis [2-  
64 4]. Despite decades of research and clear evidence of the essential nature of Dsh in Wnt signal  
65 transduction in a number of species, fundamental questions remain about how Dsh is activated,  
66 regulated, and localized in cells [2,5].

67 The sea urchin embryo has proved to be an exceptional experimental model for studying  
68 gene regulatory networks in general and how the canonical Wnt/ $\beta$ -catenin (cWnt) pathway

69 regulates animal-vegetal axis determination in particular [6-8]. In the cWnt branch of this  
70 pathway Wnt ligand binding to the LRP5/6 and Frizzled (Fz) receptor complex activates Dsh  
71 which then inhibits the destruction complex made up of Axin/APC/GSK-3 $\beta$ /CK1 $\alpha$  that targets  $\beta$ -  
72 catenin for proteasome-mediated degradation. The escape of  $\beta$ -catenin from the destruction  
73 complex allows for it to accumulate first in the cytoplasm and then translocate into the nucleus  
74 where it acts as a transcription coactivator for a number of developmentally significant genes. In  
75 the sea urchin, localized activation of cWnt signaling with its associated  $\beta$ -catenin nuclearization  
76 in the vegetal blastomeres is a crucial determinant of endomesodermal specification and the  
77 patterning of the animal-vegetal axis [9-13]. The critical role for cWnt signaling in the early  
78 specification of the vegetal pole suggests that this region of the early sea urchin embryo may be  
79 enriched in Wnt ligand or receptors [14]. However, none of the maternally expressed Wnts or  
80 Fz receptors are preferentially expressed within the vegetal pole region of the embryo according  
81 to mRNA localization [12,13,15,16]. In addition, it has been argued that  $\beta$ -catenin nuclearization  
82 in the vegetal blastomeres is a cell autonomous process not under the influence of extracellular  
83 Wnt ligands given that nuclear localization of  $\beta$ -catenin occurs in putative vegetal blastomeres of  
84 dissociated embryos [10].

85 Interestingly, Dsh in sea urchin embryos has been shown to not only play its expected role  
86 in the cWnt pathway regulation of the  $\beta$ -catenin-dependent gene expression of vegetal cells  
87 [12,17], but also to localize in discrete puncta in a novel vegetal cortical domain (VCD) that  
88 arises in oocytes and persists in eggs and embryos [12,14,17,18]. The VCD was initially  
89 recognized in early embryos overexpressing Dsh-GFP [17,18] and subsequently shown to exist  
90 in oocytes, eggs and embryos up to the 60-cell stage using immunofluorescent localization [14].  
91 Even though Dsh is maternally expressed uniformly in the egg and early embryo [16,17], current  
92 evidence indicates that the VCD region is critical for its activation and the triggering of the cWnt  
93 pathway in the vegetal cells of the embryo. For example, overexpression of Dsh in zygotes had  
94 no impact on embryonic development whereas physical dissection of the VCD prior to  
95 fertilization resulted in abnormal, animalized/anteriorized embryos [12], an outcome also seen in  
96 embryos overexpressing dominant negative Dsh [17]. In addition, transplantation of the VCD to  
97 the animal pole induced the generation of ectopic endoderm [12]. All these results suggest that  
98 Dsh alone is not sufficient to direct proper cWnt-based development, but that instead it needs to  
99 be associated with the VCD which may act as a scaffold for localized Dsh and subsequent cWnt  
100 pathway activation [14].

101 Despite the developmental importance of the VCD, relatively little is known about the precise  
102 structural organization of the Dsh localized there. Past studies have shown that Dsh is

103 arranged in cortex associated puncta and mutational analysis suggests that Dsh VCD binding is  
104 based on a N-terminal lipid-binding motif, the DIX domain, and a 21 amino acid motif between  
105 the Dsh PDZ and DEP domains [17,18]. Previous work also suggests that the Dsh puncta are  
106 not sensitive to disruption of actin filaments or microtubules in the short term, however, over the  
107 longer term cytochalasin-based actin disruption led to the unexpected degradation of Dsh pools  
108 in the egg [14]. Poorly-defined punctate staining patterns, indications of membrane vesicle  
109 binding, and/or associations with the cytoskeleton have been reported for Dsh in cells from a  
110 broad range of different species [2]. However, Dsh localization in cells remains controversial  
111 given that the punctate staining patterns have been considered non-physiological due to  
112 potential artifacts associated with biomolecular condensates formed due to Dsh over-expression  
113 [19], and other studies have suggested that Dsh can activate the cWnt pathway in the absence  
114 of cytoplasmic puncta [20].

115 In the present study we have localized sea urchin Dsh in the VCD at the ultrastructural level  
116 using super-resolution immunofluorescence microscopy and immuno-gold TEM in order to  
117 reveal the nanoscale architecture of plasma membrane tethered Dsh and investigate its  
118 potential relationship with cortical membrane structures and the actomyosin cytoskeleton. Our  
119 results indicate that Dsh in the sea urchin egg VCD is organized into well-defined puncta that  
120 consist of aggregates of multiple Dsh proteins that appear as groupings of pedestal-like  
121 structures interspersed between the microvillar cores of actin filaments in the cortex. These Dsh  
122 patches appear associated with the membrane but are not sensitive to detergent extraction  
123 suggesting an association with membrane proteins. We do not see evidence of a direct  
124 interaction between Dsh and cortical actin filaments given an analysis of our images and the  
125 persistence of Dsh puncta in eggs in which actin filaments have been disrupted with latrunculin  
126 treatment. These results confirm and extend previous studies and reveal, for the first time in any  
127 cell type, the ultrastructural organization of plasma membrane tethered Dsh.

128

129

## 130 **Materials and Methods**

### 131 **Animals, antibodies, and reagents**

132 *Lytechinus pictus* sea urchins were purchased from Marinus Scientific (Lakewood, CA) and  
133 *Strongylocentrotus purpuratus* sea urchins were collected from the waters surrounding Port  
134 Townsend, WA, and maintained at the Friday Harbor Laboratories (Friday Harbor, WA). All  
135 animals were kept in either running natural sea water or closed artificial sea water systems at

136 10-15°C. Research on sea urchin invertebrate animals is not regulated by or subject to approval  
137 from the Institutional Animal Care and Use Committee of Dickinson College.

138 Primary antibodies used included anti-SUDsh-C, an affinity-purified rabbit polyclonal  
139 antibody raised against a synthetic peptide (NH<sub>2</sub>-CMVPMMPRQLGSPEDLSGS-COOH) based  
140 on a phylogenetically conserved sequence from the sea urchin Dsh protein C terminus, a  
141 mouse monoclonal antibody against a highly conserved epitope of chicken gizzard actin (clone  
142 C4) from EMD Millipore (Burlington, MA), and a mouse monoclonal antibody against the Ser19  
143 phosphorylated form of the myosin II regulatory light chain (P-MyoRLC) from Cell Signaling  
144 Technology (Danvers, MA). Appropriate secondary antibodies conjugated to Alexa Fluor 488,  
145 568, or Oregon Green as well as Alexa Fluor 633 conjugated phalloidin were obtained from  
146 Molecular Probes (Eugene, OR). Secondary antibody conjugated to 18 nm colloidal gold was  
147 obtained from Jackson ImmunoResearch Laboratories (West Grove, PA). The actin filament  
148 disruptor Latrunculin A (100 µg/ml stock in ethanol) and the myosin II light chain kinase (MLCK)  
149 inhibitor ML-7 (100 mM stock in DMSO) were obtained from Cayman Chemical (Ann Arbor, MI),  
150 whereas the fixable fluorescent membrane dye FM1-43FX (2 mM stock in methanol) was from  
151 Molecular Probes. Unless otherwise indicated, the majority of other reagents were purchased  
152 from either Sigma-Aldrich (St. Louis, MO) or Fisher Scientific (Pittsburgh, PA).

153

#### 154 **Gamete collection, fertilization, cortex isolation, and inhibitor treatments**

155 Sea urchin gametes were collected via intracoelomic injection with 0.5 M KCl, with sperm  
156 collected dry and eggs spawned in either natural sea water or MBL artificial sea water (ASW:  
157 423 mM NaCl, 9 mM KCl, 9.27 mM CaCl<sub>2</sub>, 22.94 mM MgCl<sub>2</sub>, 25.5 mM MgSO<sub>4</sub>, 2.14 mM  
158 NaHCO<sub>3</sub>, pH 8.0) and subsequently dejellied by multiple washes with ASW. Eggs were fertilized  
159 by addition of dilute sperm, the fertilization envelopes removed using 1 M urea (pH 8.0), and  
160 then washed into and reared in MBL calcium free sea water (CFSW: MBL ASW minus CaCl<sub>2</sub>  
161 and plus 1 mM EGTA) at 10-15°C.

162 Cortices of unfertilized eggs and first division cycle embryos were generated as described in  
163 [21]. In brief, eggs/embryos were allowed to quickly settle onto poly-L-lysine (2 mg/ml) coated  
164 coverslips and then exposed to fluid shear force from a pipette containing an isotonic cortex  
165 isolation buffer (CIB: 0.8 M mannitol, 5 mM MgCl<sub>2</sub>, 10 mM EGTA, 100 mM HEPES, pH 6.8 for  
166 unfertilized eggs and pH 7.4 for embryos). Isolated cortices were rinsed twice in CIB prior to  
167 further processing for light microscopic fluorescence localization.

168 In order to test the impact of detergent extraction on Dsh localization, isolated cortices were  
169 treated with 1% Triton X-100 in CIB for one minute following isolation and immediately prior to

170 fixation. For disruption of actin filaments, eggs in ASW were treated for 20 min with 1  $\mu$ M  
171 Latrunculin A. The effect of the inhibition of myosin II light chain kinase (MLCK) was tested by  
172 treating eggs in ASW for 20 min with 50  $\mu$ M of the MLCK inhibitor ML-7.

173

#### 174 **Fixation, fluorescent staining and light microscopic imaging and analysis**

175 Isolated cortices plus and minus Triton extraction were fluorescently stained for membranes  
176 using 1-2  $\mu$ M FM1-43 [22] for two minutes prior to fixation. Cortices were fixed in 2-4%  
177 formaldehyde in CIB for 15 min followed by blocking in 2% goat serum and 1% BSA in PBS for  
178 30 minutes. Immunostaining was performed with appropriate primary and secondary antibodies  
179 diluted in the range of 1:200 to 1:300 in blocking buffer and staining took place for 30-60 min for  
180 each stage. Fluorescent phalloidin was added to the secondary antibody staining step. Cortex  
181 samples for conventional and 3D-SIM microscopy were mounted in nonhardening Vectashield  
182 antifade mounting media (Vector Laboratories, Burlingame, CA), whereas STED imaging  
183 samples were mounted in Prolong Diamond mounting media (Molecular Probes).

184 Wide-field epifluorescence microscopy of samples was performed on a Nikon (Tokyo,  
185 Japan) 80i microscope using either a 40X/0.75 NA Plan Fluor (phase contrast or DIC) or  
186 60X/1.4 NA Plan Apo phase contrast objective lens with digital images captured using a  
187 Photometrics (Tucson, AZ) CoolSnap Cf cooled CCD camera. Super-resolution microscopy  
188 was performed using two different methods. For 3D structured illumination microscopy (3D-SIM,  
189 [23] we utilized a DeltaVision OMX 3D-SIM Imaging System (GE Healthcare Bio-Sciences,  
190 Pittsburgh, PA) with an Olympus 60X/1.42 NA objective lens. Captured images were  
191 reconstructed using SoftWoRx software. Stimulated Emission Depletion (STED) super-  
192 resolution microscopy [24] was performed on a Leica (Wetzlar, Germany) Sp8 STED confocal  
193 using a 100X/1.4 NA objective lens. For all forms of microscopic images, processing and  
194 analysis was performed using Fiji/ImageJ (Bethesda, MD). Graphs were prepared and statistical  
195 analysis carried out using Graphpad Prism 8 (San Diego, CA) and figures prepared using  
196 Adobe Photoshop (San Jose, CA).

197

#### 198 **Immuno-EM localization and platinum replica TEM**

199 Immuno-EM localization of Dsh followed the methods of Svitkina [25,26]. Isolated egg  
200 cortices were fixed with 0.25% glutaraldehyde in CIB for 5 min, rinsed with PBS and then  
201 quenched for 10 min in 2 mg/ml NaBH<sub>4</sub> in PBS. Following blocking in 2% goat serum, 1% BSA,  
202 and 1 mg/ml glycine in PBS for 30 min cortices were incubated in primary anti-SUDsh-C  
203 antibody for 60 min followed by overnight incubation in colloidal gold-conjugated secondary



204 antibody in immunogold buffer (0.5 M NaCl, 20 mM Tris-HCl, pH 8.0, 0.05% Tween 20, 0.1%  
205 BSA). Following rinses in immunogold buffer, cortices were post fixed with 2% EM-grade  
206 glutaraldehyde in 0.1 M sodium cacodylate, pH 7.3 for 30 min.

207 The generation of critical point-dried and rotary-shadowed platinum replicas of  
208 immunolabeled isolated cortices followed previously described methods [25-27]. Briefly, post  
209 fixation cortices were treated with aqueous 0.1% tannic acid followed by aqueous 0.2% uranyl  
210 acetate. Then the samples were dehydrated in a graded ethanol series, critical point dried, and  
211 rotary shadowed with platinum and carbon. The platinum replicas of cortices were separated  
212 from the glass coverslips using hydrofluoric acid, mounted on Formvar-coated grids, and  
213 observed on a JEM 1011 TEM (JEOL, Peabody, MA) operated at 100 kV and digital images  
214 captured with an ORIUS 832.10W CCD camera (Gatan Inc, Warrendale, PA) and presented in  
215 inverted contrast. All EM reagents and materials were obtained from Electron Microscopy  
216 Sciences (Hatfield, PA).

217

218

## 219 **Results and Discussion**

### 220 **The Dsh array in the VCD as visualized with super-resolution microscopy of isolated egg** 221 **cortices**

222 Super-resolution imaging using 3D-SIM showed that the Dsh localization pattern in the VCD  
223 of isolated egg cortices appeared similar to a dot diagram of a concentration gradient (Fig 1A-  
224 H), as was previously documented using confocal imaging [14]. In the center of the VCD the  
225 density of Dsh puncta is high and this density diminished when moving toward the edge of the  
226 distribution (Fig 1I). Measurements of the Dsh density per square micron ( $n = 15$  cortices over  
227 3 separate experiments) varied from an average of 3.6 in the center, to 1.9 midway in the  
228 distribution, to 0.7 in the sparse region of the edge (Fig 1I,J), with the differences in density  
229 between these three regions being statistically significant ( $p < 0.001$  based on a one-way  
230 ANOVA). 3D-SIM imaging (Fig 1A-H) suggested that the Dsh puncta were discrete structures.  
231 However, imaging with higher resolution STED microscopy revealed that some of the Dsh  
232 puncta seen as individual fluorescent dots in confocal imaging (Fig 1M, arrows) were resolved  
233 as being composed of multiple spots in the STED images (Fig 1L, arrows). This indicated that  
234 the Dsh puncta consisted of aggregates of multiple Dsh proteins. The resolving power of STED  
235 is generally considered to be two-fold higher than SIM which is itself two-fold higher than  
236 conventional confocal imaging [28].

237 **Fig 1. Super-resolution imaging of Dsh and actin staining in the VCD in isolated egg cortices.** (A-  
238 H) 3D-SIM imaging of Dsh (magenta) and F-actin (green) staining of cortices isolated from *L. pictus* (A-D)  
239 and *S. purpuratus* (E-H) eggs showing the distribution of Dsh puncta relative to microvillar core actin foci.  
240 D and H are higher magnification versions of the white boxes in C and G, and elongate submembranous  
241 actin filaments are visible in D (arrow). (I-M) The distribution of Dsh in the VCD appears similar to a  
242 diagrammatic representation of a concentration gradient. As shown with the enlarged versions of the red  
243 boxes in I, the lowest density of Dsh puncta are at the VCD edge, with increased density in the midway  
244 point, and the maximum density in the center. (J) Quantification of Dsh densities in the three regions of  
245 the VCD. The Dsh VCDs of 5 cortices each from three separate experiments were analyzed and the  
246 densities in these 3 regions are all statistically significantly different. (K-M) STED imaging of Dsh staining  
247 in the *S. purpuratus* egg VCD reveals that single punctum in confocal images (L, arrows) often appear as  
248 multiple spots in the higher resolution STED images (M, arrows). Scale bars = 5  $\mu\text{m}$ .

249  
250 Within the VCD the Dsh puncta were interspersed with actin filaments that were present in  
251 two basic organizations: bright foci representing filament aggregations within the cores of the  
252 short microvillar found on the surface of unfertilized eggs [29,30], and, particularly in *L. pictus*  
253 cortices, faint long actin filaments running parallel to the plane of the plasma membrane (Fig 1D  
254 arrow). The more elongate microvillar actin staining pattern seen in the *L. pictus* egg cortices  
255 (Fig 1A-D) relative to the more circular microvilli in *S. purpuratus* cortices (Fig 1E-H) are  
256 indicative of species-specific differences in microvillar morphology [30]. Our 3D-SIM images did  
257 not suggest a direct interaction between microvillar actin arrays and Dsh puncta, although in  
258 other cells and tissues it has been suggested that Dsh interacts with actin filaments, particularly  
259 within stress fibers and focal adhesions [31,32].

260  
261 **Platinum replica TEM of the egg VCD indicates that Dsh puncta consist of aggregates of**  
262 **pedestal-like structures**

263 Immunogold labeling combined with platinum replica TEM of isolated cortices has allowed us  
264 to investigate the ultrastructure of the Dsh puncta visualized at the light microscopic level. Low  
265 magnification TEM images of cortices labeled for Dsh with 18 nm colloidal gold (colored gold in  
266 Fig 2A-D; Fig 3A-H) demonstrated a sparse array of gold decorated aggregates (arrows in Fig  
267 2A) amongst a distribution of microvillar core (MV in Fig 2B) and submembranous actin  
268 filaments, as well as the remnants of membranous cortical granules (CG in Fig 2A), vesicles  
269 and endoplasmic reticulum. Higher magnification imaging allowed for the identification of actin  
270 filaments (colored green in Fig 2E) due to their characteristic platinum replica TEM appearance  
271 [25-27,33] and revealed that Dsh labeled aggregates appeared in patches on the cytoplasmic



272 face of the plasma membrane (colored magenta in Fig 2E). A gallery of Dsh-labeled aggregates  
273 (Fig 3A-F) showed that single colloidal gold particles were located on the top of pedestal-  
274 shaped structures that grouped together into patches that were distinct from the surrounding  
275 plasma membrane and underlying meshwork of the vitelline envelope. Within the aggregates  
276 the labeled structures often appeared close together and on occasion adopted linear or ring-  
277 shaped arrangements (Fig 3E,F). The Dsh aggregates did not colocalize with the tangles of  
278 short actin filaments present in microvillar cores (Figs 2 and 3), however they did on occasion  
279 show an association with submembranous elongate actin filaments running parallel with the  
280 plane of the membrane (Figs 2E,F and 3A,C,F,I). In terms of quantitative analysis of TEM  
281 images, the density of the distribution of Dsh aggregates in the TEM images fell within the range  
282 of those seen with light microscopy (Fig 3G), and the overall average area of single Dsh labeled  
283 aggregates was  $\sim 18,200 \text{ nm}^2$  (Fig 3H;  $n = 5$  cortices over 2 separate experiments). Comparison  
284 of regions of the same cortex that contained Dsh-labeled patches (Fig 3I) with areas that did not  
285 (Fig 3J) revealed that these unlabeled regions did not contain similar membrane-associated  
286 structures (Fig 3J), indicating that these structures were specific to the Dsh puncta in the VCD.  
287

288 **Fig 2. Platinum replica TEM of Dsh and actin in the VCD in isolated egg cortices.** Low (A, C) to  
289 medium (B,D) magnification images of cortices shows Dsh-specific colloidal gold (colored gold) staining of  
290 patches in the plane of the membrane (arrows in A). Tangled knots of short actin filaments appear in the  
291 cores of microvilli (MV in B) and numerous elongate actin filaments running parallel to the plane of the  
292 membrane are present. Cortical granules appear as shriveled structures (CG in A) and other  
293 membranous structures are also present. The meshwork that appears in the background of the images  
294 corresponds to the vitelline envelope. The white box in C appears at higher magnification in E in which  
295 Dsh aggregates are colored magenta and identifiable actin filaments in green. Dsh positive patches do  
296 not associate with MV core actin assemblages but do come in close proximity to submembranous actin  
297 filaments. (F,G) High magnification images indicate that Dsh patches consist of aggregates of pedestal-  
298 like structures - each labeled with a single colloidal gold particle - that can be grouped into one or more  
299 clusters. *L. pictus* cortices = A,B,F,G; *S. purpuratus* cortices = C,D,E. Bar length indicated in the images.  
300

301 **Fig 3. Platinum replica TEM demonstrates that Dsh puncta correspond to patches of aggregates of**  
302 **pedestal-like structures.** (A-F) A gallery of high magnification images of Dsh labeled structures  
303 demonstrates that they consist of aggregates of pedestal-like structures in a variety of groupings. The top  
304 of each pedestal is labeled with a single colloidal gold particle suggesting that this area may correspond  
305 to the location of the C terminus of the Dsh protein. (G) The density of the Dsh puncta in TEM images  
306 from 3 separate cortices over three experiments (grey box) falls in the range of densities seen in the  
307 immunofluorescence images (black boxes reproduced from graph Fig 1J). (H) The area of the Dsh

308 aggregates from five cortices each from 2 separate experiments shows an average of ~18,200 nm<sup>2</sup>, and  
309 the differences in the areas between the two species are not statistically significant. (I, J) Comparison of  
310 regions of the same cortex in which Dsh labeling is present (I) and is not present (J) shows that the  
311 patches associated with the Dsh labeling are not visible in the unlabeled regions, suggesting that these  
312 structures are specific to the Dsh puncta. *L. pictus* cortices = A,B,D,E; *S. purpuratus* cortices = C,F,I,J.  
313 Scale bars = 200 nm.

314

315 Weitzel et al. [17] and Leonard and Etensohn [18] conducted mutational analysis of the  
316 association of sea urchin Dsh-GFP with the VCD. Their results indicated that this localization  
317 could be abolished by deletion of the entire N terminus, the DIX domain, a double mutation of  
318 the phospholipid-binding region of DIX (K57A, E58A), or a 21 amino acid motif between the  
319 PDZ and DEP domains. These results combined with our TEM images suggest that Dsh is  
320 oriented with its N terminal domain closer to the membrane which may explain why our  
321 SUDshC-terminus specific antibody appears to label the tops of the pedestal-like structures that  
322 are located farther away from the membrane surface. Dsh protein has also been shown to form  
323 oligomers via interactions between DIX domains in vitro and in vivo [34] and it is possible that  
324 the Dsh aggregates seen in our TEM images may represent some form of Dsh oligomerization  
325 in association with the membrane.

326

### 327 **The Dsh VCD array is resistant to Triton detergent extraction, disruption of actin** 328 **filaments, and inhibition of myosin II contraction**

329 The punctate Dsh staining present in sea urchin eggs and embryos and in many other cell  
330 types has been hypothesized to be caused by an association of Dsh with intracellular vesicles  
331 [2,17,18]. We tested the nature of the interaction between the Dsh puncta and membranes by  
332 performing a 1% Triton X-100 detergent extraction of egg cortices immediately after isolation  
333 and prior to fixation. Dsh immunofluorescent staining of the VCD persisted following detergent  
334 extraction (Fig 4A-H) suggesting that the Dsh is in a detergent resistant structure associated  
335 with the plasma membrane. The disruption of membranes by the Triton-based extraction of  
336 cortices was confirmed by the absence of cortical granules in phase contrast images of  
337 extracted cortices (Fig 4D,H), as well as the loss of the membrane-dependent fluorescent  
338 staining with the lipophilic dye FM1-43 (Fig 4I-N). These results suggest that Dsh interacts with  
339 either detergent resistant regions of the membrane – such as lipid rafts which have been  
340 previously identified in sea urchin eggs [35] – and/or it may be binding to a detergent resistant  
341 membrane protein assemblage. This lack of detergent sensitivity argues against the association  
342 of Dsh with the membranes of cortex-associated vesicles in the VCD, which is agreement with

343 studies in other cells suggesting that Dsh puncta are not associated with cytoplasmic vesicles  
344 [36]. This includes work in *Xenopus* oocytes and embryos in which vegetal pole-associated Dsh  
345 puncta are argued to help direct cWnt-dependent axis specification following cortical rotation  
346 [37,38]. Tadjuidje et al. [39] have reported that *Xenopus* oocytes depleted of maternal Dsh  
347 (Dvl2/3) RNA still can activate cWnt signaling and that this derives from the persistence of Dsh  
348 puncta in the submembranous region of the vegetal cortex. These Dsh puncta did not  
349 codistribute with markers for endosomes, exocytotic vesicles or lysosomes and therefore do not  
350 appear associated with vesicles and may instead correspond to protein aggregates [39].

351  
352 **Fig 4. The Dsh VCD array is resistant to Triton detergent extraction.** (A-H) Control isolated egg  
353 cortex from *L. pictus* (A-D) stained for Dsh (magenta) and actin (green) showing Dsh array and cortical  
354 granules in phase contrast. The Triton extracted cortex (E-H) demonstrates the persistence of the Dsh  
355 array following detergent extraction despite the loss of cortical granules seen in phase contrast. (I-N)  
356 Membrane staining with the fixable dye FM1-43 (green) shows that in control egg cortices (I-K) that the  
357 Dsh (magenta) array is present along with a variety of membranous structures. In detergent extracted  
358 cortices (L-N) the Dsh array is still present even though specific membrane staining is lost. Scale bars =  
359 10  $\mu$ m.

360  
361 Earlier work by [14] has indicated that the Dsh VCD localization in the sea urchin egg is  
362 sensitive to disruption of actin filaments using the drugs cytochalasin B and D and >2 hour  
363 incubation periods following a 20 min drug treatment. In addition, studies in other cell types  
364 have argued for an interaction between Dsh and actin filaments [31,32]. We tested the  
365 association between actin and Dsh in the short term using the drug latrunculin A (LatA). Unlike  
366 the cytochalasins that tend to interfere with actin monomer addition to the plus end, LatA  
367 disrupts actin filaments primarily via monomer binding and subsequent sequestration. We  
368 treated embryos with 1  $\mu$ M LatA for 20 min followed by isolation of cortices and anti-Dsh  
369 immunofluorescent staining. Dsh labeling of the VCD was maintained in LatA treated egg  
370 cortices even though the LatA led to a clear disruption of cortical actin filaments (Fig 5D-F). We  
371 also tested for the potential involvement of myosin II in the Dsh VCD localization given that the  
372 actomyosin cortex has been shown to influence the asymmetric distribution of the important  
373 polarity determining PAR protein complex in *C. elegans* [40,41] and sea urchin [42] embryos. In  
374 sea urchins, the apical PAR localization was disrupted by treating embryos with the MLCK  
375 inhibitor ML-7 [42]. MLCK inhibition is known to block myosin II bipolar filament assembly and  
376 the enhancement of actin activated ATPase activity, and ML-7 has been used extensively as a  
377 myosin II inhibitor in previous studies on sea urchin embryos [42-45]. We treated eggs with 50

378  $\mu\text{M}$  ML-7 for 20 min and then isolated the cortices and stained for Dsh. ML-7 treatment had no  
379 impact on Dsh VCD localization or actin distribution in the egg cortices (Fig 5G-I).

380

381 **Fig 5. The Dsh VCD persists following disruption of actin filaments or inhibition of myosin II**  
382 **contraction.** Control isolated egg cortex from *L. pictus* (A-C) contains the expected Dsh array (magenta)  
383 along with microvillar actin (green). In cortices from eggs treated with the actin filament disrupting drug  
384 LatA (D-F) the Dsh array persists (D) whereas the actin staining is greatly reduced (E). Both Dsh (G) and  
385 actin (H) staining appear unaffected in cortices isolated from eggs treated with the MLCK inhibitor ML-7  
386 (G-I) in order to inhibit myosin II contraction. Scale bar = 10  $\mu\text{m}$ ; magnifications of A-I are equivalent.

387

388 **The Dsh VCD array is bisected by the cytokinetic contractile ring in isolated cortices of**  
389 **first division embryos**

390 The Dsh VCD array persists post-fertilization [14,17,18] despite the extensive remodeling of  
391 the plasma membrane caused by the mass exocytosis of cortical granules followed by the  
392 endocytic uptake of membrane [46]. We investigated the behavior of the Dsh VCD array in early  
393 cleavage embryos by labeling cortices isolated from first division embryos with Dsh and probes  
394 specific for the cytokinetic contractile ring proteins myosin II and actin. We were interested in the  
395 relationship between the Dsh VCD array and the contractile ring given that our previous work  
396 [27] has indicated that the contractile ring consists of a very dense assemblage of actin and  
397 myosin II filaments in close association with the plasma membrane. Previous work with either  
398 Dsh-GFP [17] or Dsh immunofluorescent labeling of whole embryos [14] has suggested that the  
399 first division cleavage furrow bisects the Dsh VCD. Cortices stained for Dsh and activated  
400 myosin II via staining with an antibody against the Ser19 phosphorylated version of the myosin  
401 II regulatory light chain revealed that the Dsh array coexisted with the contractile ring in regions  
402 in which they are both found (Fig 6). In the majority of isolated cleavage cortices, the Dsh  
403 distribution appeared to be bisected by the contractile ring structure (Fig 6), as would be  
404 expected for the two daughter cells to inherit roughly equivalent amounts of the VCD. The Dsh  
405 VCD array in first division cortices is not as highly ordered as the VCD in egg cortices given that  
406 it often does not closely resemble a concentration gradient pattern and the individual puncta  
407 appear larger and less densely distributed (Fig 6).

408

409 **Fig 6. The Dsh VCD in cortices isolated from first division embryos is bisected by the cytokinetic**  
410 **contractile ring.** (A-Q) Widefield image of cortices isolated from first division *S. purpuratus* embryos  
411 indicate that the Dsh punctate VCD array (A,E,I,N; magenta in C,G,L,Q) is often bisected by the  
412 cytokinetic contractile ring which labels for activated myosin II (B,F,J,O; green in C,G,L,Q) and F-actin

413 (K,P; blue in L,Q). The Dsh VCD does not appear as well ordered as the arrays in egg cortices (Fig 1),  
414 and individual puncta appear larger and less numerous. Transmitted light DIC (D,H at equivalent  
415 magnification) and phase contrast (insets M,R at reduced magnification) images of individual cortices are  
416 provided for context. Scale bar = 10  $\mu$ m, magnifications of A-L and N-Q are all equivalent.

417

## 418 **Conclusions**

419 Despite some 25 years of research effort, aspects of the activation, regulation and  
420 localization of the central cWnt pathway protein Dsh remain enigmatic [2-4]. In the present study  
421 we use super-resolution and platinum replica transmission electron microscopy imaging of the  
422 sea urchin VCD to provide the first visualization of the nanoscale structural organization of  
423 membrane tethered Dsh. We show that Dsh is found associated with pedestal-like structures  
424 organized into aggregates located in the plane of the membrane, and that these clusters are  
425 resistant to detergent extraction and to treatment with inhibitors of actin polymerization and  
426 myosin II contraction. We also demonstrate that the Dsh VCD punctate arrays codistribute with  
427 the dense filamentous structure of the cytokinetic contractile ring in first division embryos. The  
428 general structural organization of membrane tethered Dsh that we have characterized in the sea  
429 urchin VCD may be applicable to the plasma membrane-associated Dsh puncta apparent in  
430 many cell types and particularly to those found in the vegetal cortex of *Xenopus* oocytes.

431 We speculate that the Dsh labeling in the sea urchin VCD could correspond to oligomers of  
432 Dsh present in the puncta and that our anti-SUDsh-C terminus antibody is labeling the end of  
433 the protein that is farthest from the surface of the membrane. Another intriguing possibility is  
434 that the Dsh aggregates might represent biomolecular condensates that have become  
435 associated with the membrane surface, as membranes have been argued to be one of the  
436 control centers of phase separation in a number of cell types [47] and condensates have been  
437 argued to play important roles in cWnt signaling [48]. The major pathway proteins Dsh, Axin,  
438 and APC all contain the condensate-requiring intrinsically disordered regions and have been  
439 shown to form dynamic, non-membrane enclosed puncta in cells, which suggests that the  $\beta$ -  
440 catenin destruction complex and the Dsh-dependent signalosome correspond to different forms  
441 of related biomolecular condensates [48]. It is intriguing that in sea urchins [14] and in *Xenopus*  
442 [37] Dsh associated with vegetal puncta undergo postranslational modifications that correlate  
443 with cWnt activation. Our current working hypothesis is that the Dsh structures we have defined  
444 serve as autonomous scaffolds for localized cWnt pathway activation at the vegetal pole during  
445 early sea urchin development.

446

447

## 448 **Acknowledgements**

449 We gratefully acknowledge the expert assistance of Dr. Xufeng Wu (National Heart, Lung,  
450 and Blood Institute, National Institutes of Health) with 3D-SIM imaging, of Dr. Simon Watkins  
451 and Michael Calderon (Center for Biologic Imaging, University of Pittsburgh) with STED  
452 imaging, and Drs. Tanya Svitkina and Changsong Yang (University of Pennsylvania) with  
453 platinum replica TEM methods. Thanks are also extended to Dr. Billie Swalla (University of  
454 Washington) for access to instrumentation and reagents while we were in summer residence at  
455 Friday Harbor Laboratories. This research was funded by National Science Foundation  
456 collaborative research grants to JHH (MCB-1917976) and CBS (MCB-1917983).

457

458

## 459 **References**

460 1. Logan CY, Nusse R. The Wnt signaling pathway in development and disease. *Annu Rev Cell*  
461 *Dev Biol.* 2004; 20: 781-810. doi: 10.1146/annurev.cellbio.20.010403.113126.

462

463 2. Wallingford JB, Habas R. The developmental biology of Dishevelled: an enigmatic protein  
464 governing cell fate and cell polarity. *Development.* 2005; 132: 4421-4436.  
465 doi:10.1242/dev.02068.

466

467 3. Gao C, Chen Y-G. Dishevelled: the hub of Wnt signaling. *Cell Signal.* 2010; 22: 717-727.  
468 doi:10.1016/j.cellsig.2009.11.021.

469

470 4. Sharma M, Castro-Piedras I, Simmons Jr GE, Pruitt K. Dishevelled: a masterful conductor of  
471 complex Wnt signals. *Cell Signal.* 2018; 47: 52-64. doi:10.1016/j.cellsig.2018.03.004.

472

473 5. Mlodzik M. The Dishevelled protein family: still rather a mystery after over 20 years of  
474 molecular studies. *Curr Top Dev Biol.* 2016; 117: 75-91. doi:10.1016/bs.ctdb.2015.11.027.

475

476 6. Angerer LM, Angerer, RC. Animal–vegetal axis patterning mechanisms in the early sea  
477 urchin embryo. *Dev Biol* 2000; 218: 1–12. doi.org/10.1006/dbio.1999.9553.

478

479 7. Croce JC, McClay DR. The canonical Wnt pathway in embryonic axis polarity. *Semin Cell*  
480 *Dev Biol.* 2006; 17: 168-174. doi: 10.1016/j.semcd.2006.04.004.



- 481  
482 8. Kumburegama S, Wikramanayake AH. Wnt signaling in the early sea urchin embryo.  
483 *Methods Mol Biol.* 2008; 469: 187-199.  
484  
485 9. Wikramanayake AH, Huang L, Klein WH.  $\beta$ -catenin is essential for patterning the maternally  
486 specified animal-vegetal axis in the sea urchin embryo. *Proc Natl Acad Sci USA.* 1998; 95:  
487 9343–9348. doi:10.1073/pnas.95.16.9343.  
488  
489 10. Logan CY, Miller JR, Ferkowicz MJ, McClay DR. Nuclear  $\beta$ -catenin is required to specify  
490 vegetal cell fates in the sea urchin embryo. *Development.* 1999; 126: 345–357. doi:  
491 10.1007/978-1-60327-469-2\_14.  
492  
493 11. Wikramanayake AH, Peterson R, Chen J, Huang L, Bince JM. Nuclear beta-catenin-  
494 dependent Wnt8 signaling in vegetal cells of the early sea urchin embryo regulates gastrulation  
495 and differentiation of endoderm and mesoderm cell lineages. *Genesis.* 2004; 39: 194-205.  
496 doi:10.1002/gene.20045.  
497  
498 12. Croce J, Range R, Wu S-Y, Miranda E, Lhomond G, Pang JC, et al. Wnt6 activates  
499 endoderm in the sea urchin gene regulatory network. *Development.* 2011; 138: 3297-3306.  
500 doi:10.1242/dev.058792.  
501  
502 13. Lhomond G, McClay DR, Gache C, Croce JC. Frizzled1/2/7 signaling directs beta-catenin  
503 nuclearisation and initiates endoderm specification in macromeres during sea urchin  
504 embryogenesis. *Development.* 2012; 139: 816-825. doi:10.1242/dev.072215.  
505  
506 14. Peng CJ, Wikramanayake AH. Differential regulation of Disheveled in a novel vegetal  
507 cortical domain in sea urchin eggs and embryos: implications for the localized activation of  
508 canonical Wnt signaling. *PLoS ONE.* 2013; 8: e80693. doi:10.1371/journal.pone.0080693.  
509  
510 15. Croce JC, Wu S-Y, Xu R, Duloquin L, Wikramanayake AH, Gache C, et al. A genome-wide  
511 survey of the evolutionary conserved Wnt pathways in the sea urchin *Strongylocentrotus*  
512 *purpuratus*. *Dev Biol.* 2006; 300: 121-131. doi:10.1016/j.ydbio.2006.08.045.  
513

- 514 16. Stamateris RE, Rafiq K, Etensohn CA. The expression and distribution of Wnt and Wnt  
515 receptor mRNAs during early sea urchin development. *Gene Expr Patterns*. 2010; 10: 60-64.  
516 doi:10.1016/j.gep.2009.10.004.  
517
- 518 17. Weitzel HE, Illies MR, Byrum CA, Xu R, Wikramanayake AH, Etensohn CA. Differential  
519 stability of beta-catenin along the animal-vegetal axis of the sea urchin embryo mediated by  
520 Dishevelled. *Development*. 2004; 131: 2947-2956. doi:10.1242/dev.01152.  
521
- 522 18. Leonard JD, Etensohn CA. Analysis of Dishevelled localization and function in the early sea  
523 urchin embryo. *Dev Biol*. 2007; 306: 50-65. doi:10.1016/j.ydbio.2007.02.041.  
524
- 525 19. Ma W, Chen M, Kang H, Steinhart Z, Angers S, He X, et al. Single-molecule dynamics of  
526 Dishevelled at the plasma membrane and Wnt pathway activation. *Proc Natl Acad Sci USA*.  
527 2020; 117: 1690-16701. doi:10.1073/pnas.1910547117.  
528
- 529 20. Smalley MJ, Signoret N, Robertson D, Tilley A, Hann A, Ewan K, et al. Dishevelled (Dvl-2)  
530 activates canonical Wnt signaling in the absence of cytoplasmic puncta. *J Cell Sci*. 2005; 118:  
531 5279-5289. doi:10.1242/jcs.02647.  
532
- 533 21. Henson JH, Samasa B, Burg EC. High resolution imaging of the cortex isolated from sea  
534 urchin eggs and embryos. *Methods Cell Biol*. 2019; 151: 419-432.  
535 doi.org/10.1016/bs.mcb.2019.01.005.  
536
- 537 22. Terasaki M. Visualization of exocytosis during sea urchin egg fertilization using confocal  
538 microscopy. *J Cell Sci*. 1995; 108: 2293-2300.  
539
- 540 23. Gustafsson MG, Shao L, Carlton PM, Wang CJR., Golubovskaya IN, Cande WZ, et al.  
541 Three-dimensional resolution doubling in wide-field fluorescence microscopy by structured  
542 illumination. *Biophys J*. 2008; 94: 4957-497. doi:10.1529/biophysj.107.120345.  
543
- 544 24. Hell SW, Wichmann J. Breaking the diffraction resolution limit by stimulated emission:  
545 stimulated-emission-depletion fluorescence microscopy. *Optics Letters*. 1994; 19: 780-782.  
546 doi: 10.1364/ol.19.000780.  
547

- 548 25. Svitkina T. Electron microscopic analysis of the leading edge in migrating cells. *Methods*  
549 *Cell Biol.* 2007; 79: 295-319. doi:10.1016/S0091-679X(06)79012-4.  
550
- 551 26. Svitkina T. Imaging cytoskeleton components by electron microscopy. *Methods Mol Biol.*  
552 2016; 1365: 99-118. doi:10.1007/978-4939-3124-8\_5.  
553
- 554 27. Henson JH, Ditzler CE, Germain A, Irwin PM, Vogt ET, Yang S, et al. The ultrastructural  
555 organization of actin and myosin II filaments in the contractile ring: new support for an old model  
556 of cytokinesis. *Mol Biol Cell.* 2017; 28: 613-623. doi:10.1091/mbc.E16-0600466.  
557
- 558 28. Schermelleh L., Heintzmann R., Leonhardt H. A guide to super-resolution fluorescence  
559 microscopy. *J Cell Biol.* 2010; 190: 165-175. doi:10.1083/jcb.201002018.  
560
- 561 29. Sardet C. The ultrastructure of the sea urchin egg cortex isolated before and after  
562 fertilization. *Dev Biol.* 1984; 105: 196-210. doi:10.1016/0012-1606(84)9027506.  
563
- 564 30. Henson JH, Begg DA. Filamentous actin organization in the unfertilized sea urchin egg  
565 cortex. *Dev Biol.* 1988; 127: 338-348. doi:10.1016/0012-1606(88)90320-x.  
566
- 567 31. Torres MA, Nelson, WJ. Colocalization and redistribution of dishevelled and actin during  
568 Wnt-induced mesenchymal morphogenesis. *J Cell Biol* 2000; 149: 1433–1442.  
569 doi: 10.1083/jcb.149.7.1433  
570
- 571 32. Capelluto, DG, Kutateladze TG, Habas R, Finkielstein CV, He X, Overduin M. The DIX  
572 domain targets dishevelled to actin stress fibers and vesicular membranes. *Nature.* 2002; 419:  
573 726–729. doi.org/10.1038/nature01056.  
574
- 575 33. Henson JH, Yeterian M, Weeks RM, Medrano AE, Brown BL, Geist, HL, et al. Arp2/3  
576 complex inhibition radically alters lamellipodial actin architecture, suspended cell shape, and the  
577 cell spreading process. *Mol Biol Cell* 2015; 26: 887-900. doi:10.1091/mbc.E14-07-1244  
578
- 579 34. Gammons M, Bienz M. Multiprotein complexes governing Wnt signaling transduction. *Curr*  
580 *Op Cell Biol.* 2018; 51: 42-49. doi.org/10.1016/j.ceb.2017.10.008  
581

- 582 35. Belton RJ Jr, Adams NL, Foltz KR. Isolation and characterization of sea urchin egg lipid rafts  
583 and their possible function during fertilization. *Mol Reprod Dev.* 2001; 59: 294-305  
584 doi: 10.1002/mrd.1034.  
585
- 586 36. Schwarz-Romond T, Merrifield C, Nichols BJ, Bienz M. The Wnt signaling effector  
587 Dishevelled forms dynamic protein assemblies rather than stable associations with cytoplasmic  
588 vesicles. *J Cell Sci.* 2005; 118: 5269-5277. doi:10.1242/jcs02646.  
589
- 590 37. Miller JR, Rowning BA, Larabell CA, Yang-Snyder JA, Bates RL, Moon RT. Establishment of  
591 the dorsal-ventral axis in *Xenopus* embryos coincides with the dorsal enrichment of Dishevelled  
592 that is dependent on cortical rotation. *J Cell Biol.* 1999; 146: 427-437.  
593 doi: 10.1083/jcb.146.2.427  
594
- 595 38. Weaver C, Kimelman D. Move it or lose it: axis specification in *Xenopus*. *Development.*  
596 2004; 131: 3491-3499. doi: 10.1242/dev.01284.  
597
- 598 39. Tadjuidje E, Sang-Wook C, Louza M, Wylie C, Heasman J. The functions of maternal 2 and  
599 3 in the early *Xenopus* embryo. *Dev Dynamics.* 2011; 240: 1727-1736.  
600 doi:10.1002/dvdy.22671.  
601
- 602 40. Cowan CR, Hyman AA. Asymmetric cell division in *C. elegans*: cortical polarity and spindle  
603 positioning. *Annu Rev Cell Dev Biol.* 2004; 20: 427-453.  
604
- 605 41. Munro E, Nance J, Priess JR. Cortical flows powered by asymmetrical contraction transport  
606 PAR proteins to establish and maintain anterior-posterior polarity in the early *C. elegans*  
607 embryo. *Dev Cell.* 2004; 7: 413-424. doi:10.1016/j.devcel.2004.08.001.  
608
- 609 42. Moorhouse KS, Gudejko HFM, McDougall A, Burgess DR. Influence of cell polarity on early  
610 development of the sea urchin embryo. *Dev Dynamics.* 2015; 244: 1469-1484. doi:  
611 10.1002/dvdy.24337.  
612
- 613 43. Miyoshi H, Satoh SK, Yamada E, Hamaguchi Y. Temporal change in local forces and total  
614 force all over the surface of the sea urchin egg during cytokinesis. *Cell Motil*  
615 *Cytoskeleton.* 2006; 63: 208– 221. doi: 10.1002/cm20118.

616

617 44. Lucero A, Stack C, Bresnick AR, Shuster CB. A global, myosin light chain kinase-dependent  
618 increase in myosin II contractility accompanies the metaphase-anaphase transition in sea urchin  
619 eggs. *Mol Biol Cell*. 2006; 17: 4093-4104. doi: 10.1091/mbc.e06-02-0119.

620

621 45. Uehara R, Hosoya H, Mabuchi I. In vivo phosphorylation of regulatory light chain of myosin  
622 II in sea urchin eggs and its role in controlling myosin localization and function during  
623 cytokinesis *Cell Motil Cytoskeleton*. 2008; 65: 100-115. doi: 10.1002/cm.20246.

624

625 46. Trimmer JS, Vacquier VD. Activation of sea urchin gametes. *Ann Rev Cell Biol*. 1986; 2: 1-  
626 26.

627

628 47. Snead WT, Gladfelter AS. The control centers of biomolecular phase separation: how  
629 membrane surfaces, PTMs, and active processes regulate condensation. *Mol Cell*. 2019; 76:  
630 295-305. doi.org/10.1016/j.molcel.2019.09.016.

631

632 48. Schaefer KN, Peifer M. Wnt/Beta-Catenin signaling regulation and a role for biomolecular  
633 condensates. *Dev Cell*. 2019; 48: 429-444. doi.org/10.1016/j.devcel.2019.01.025.



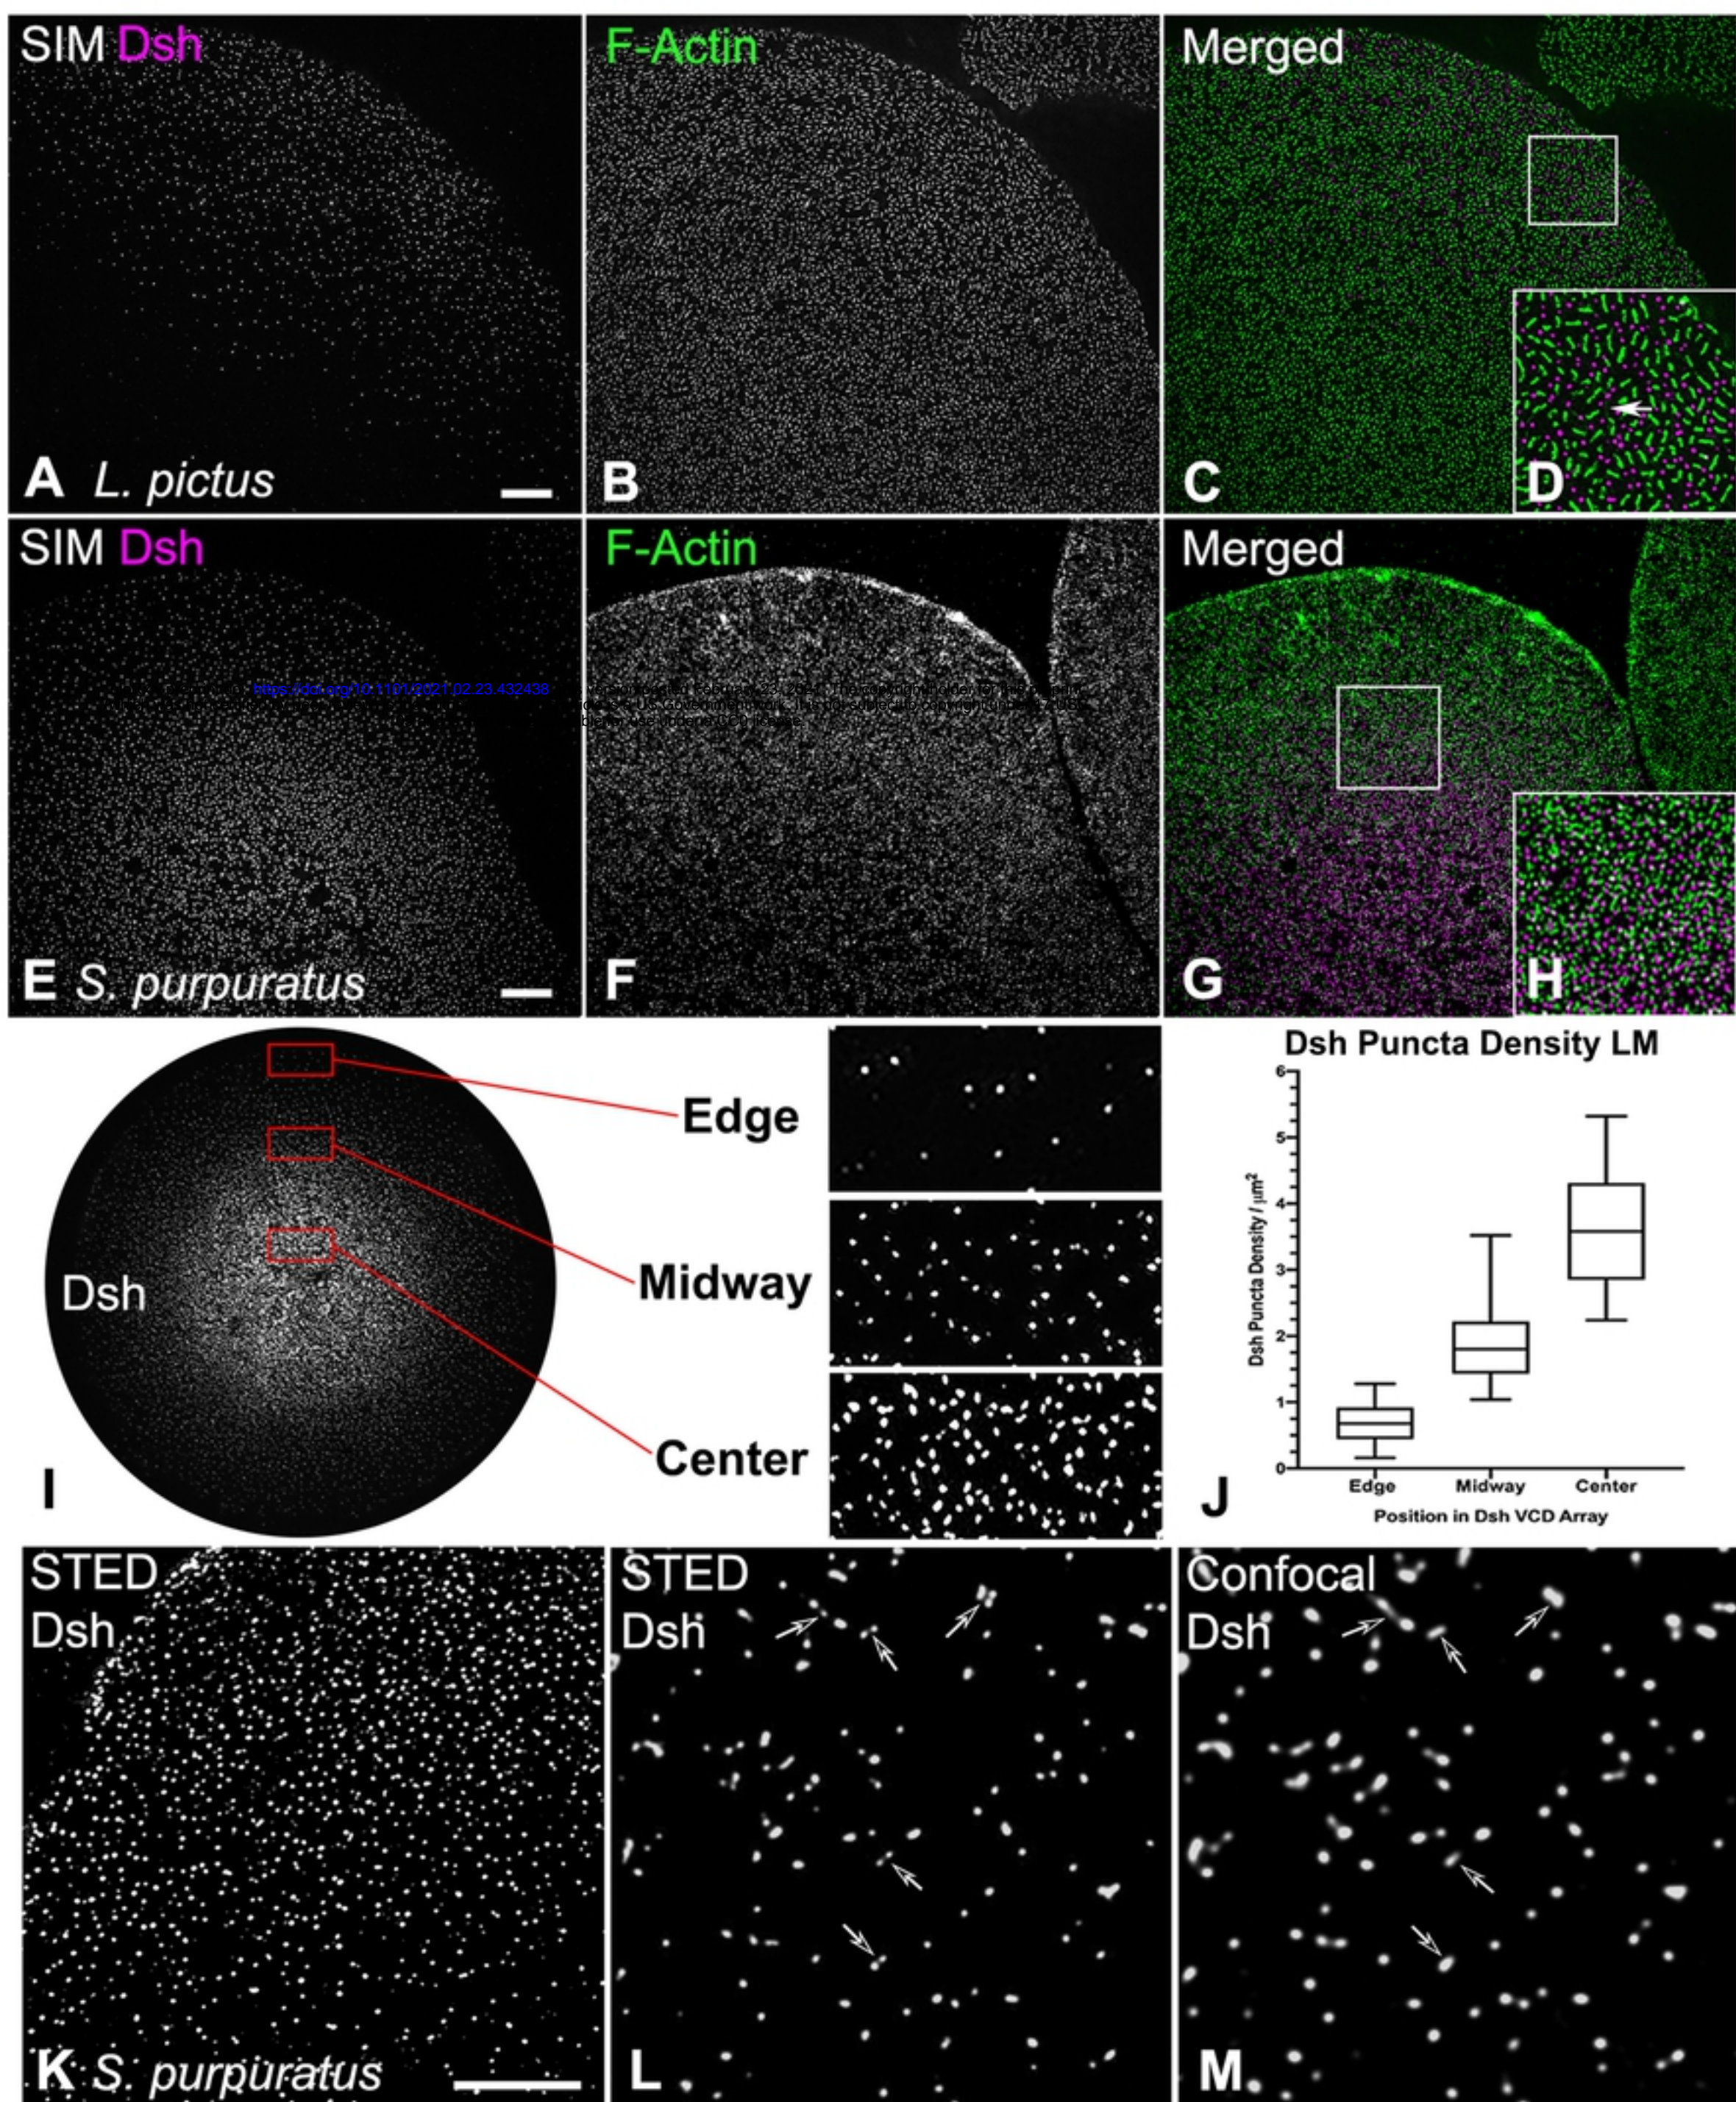

Figure 1



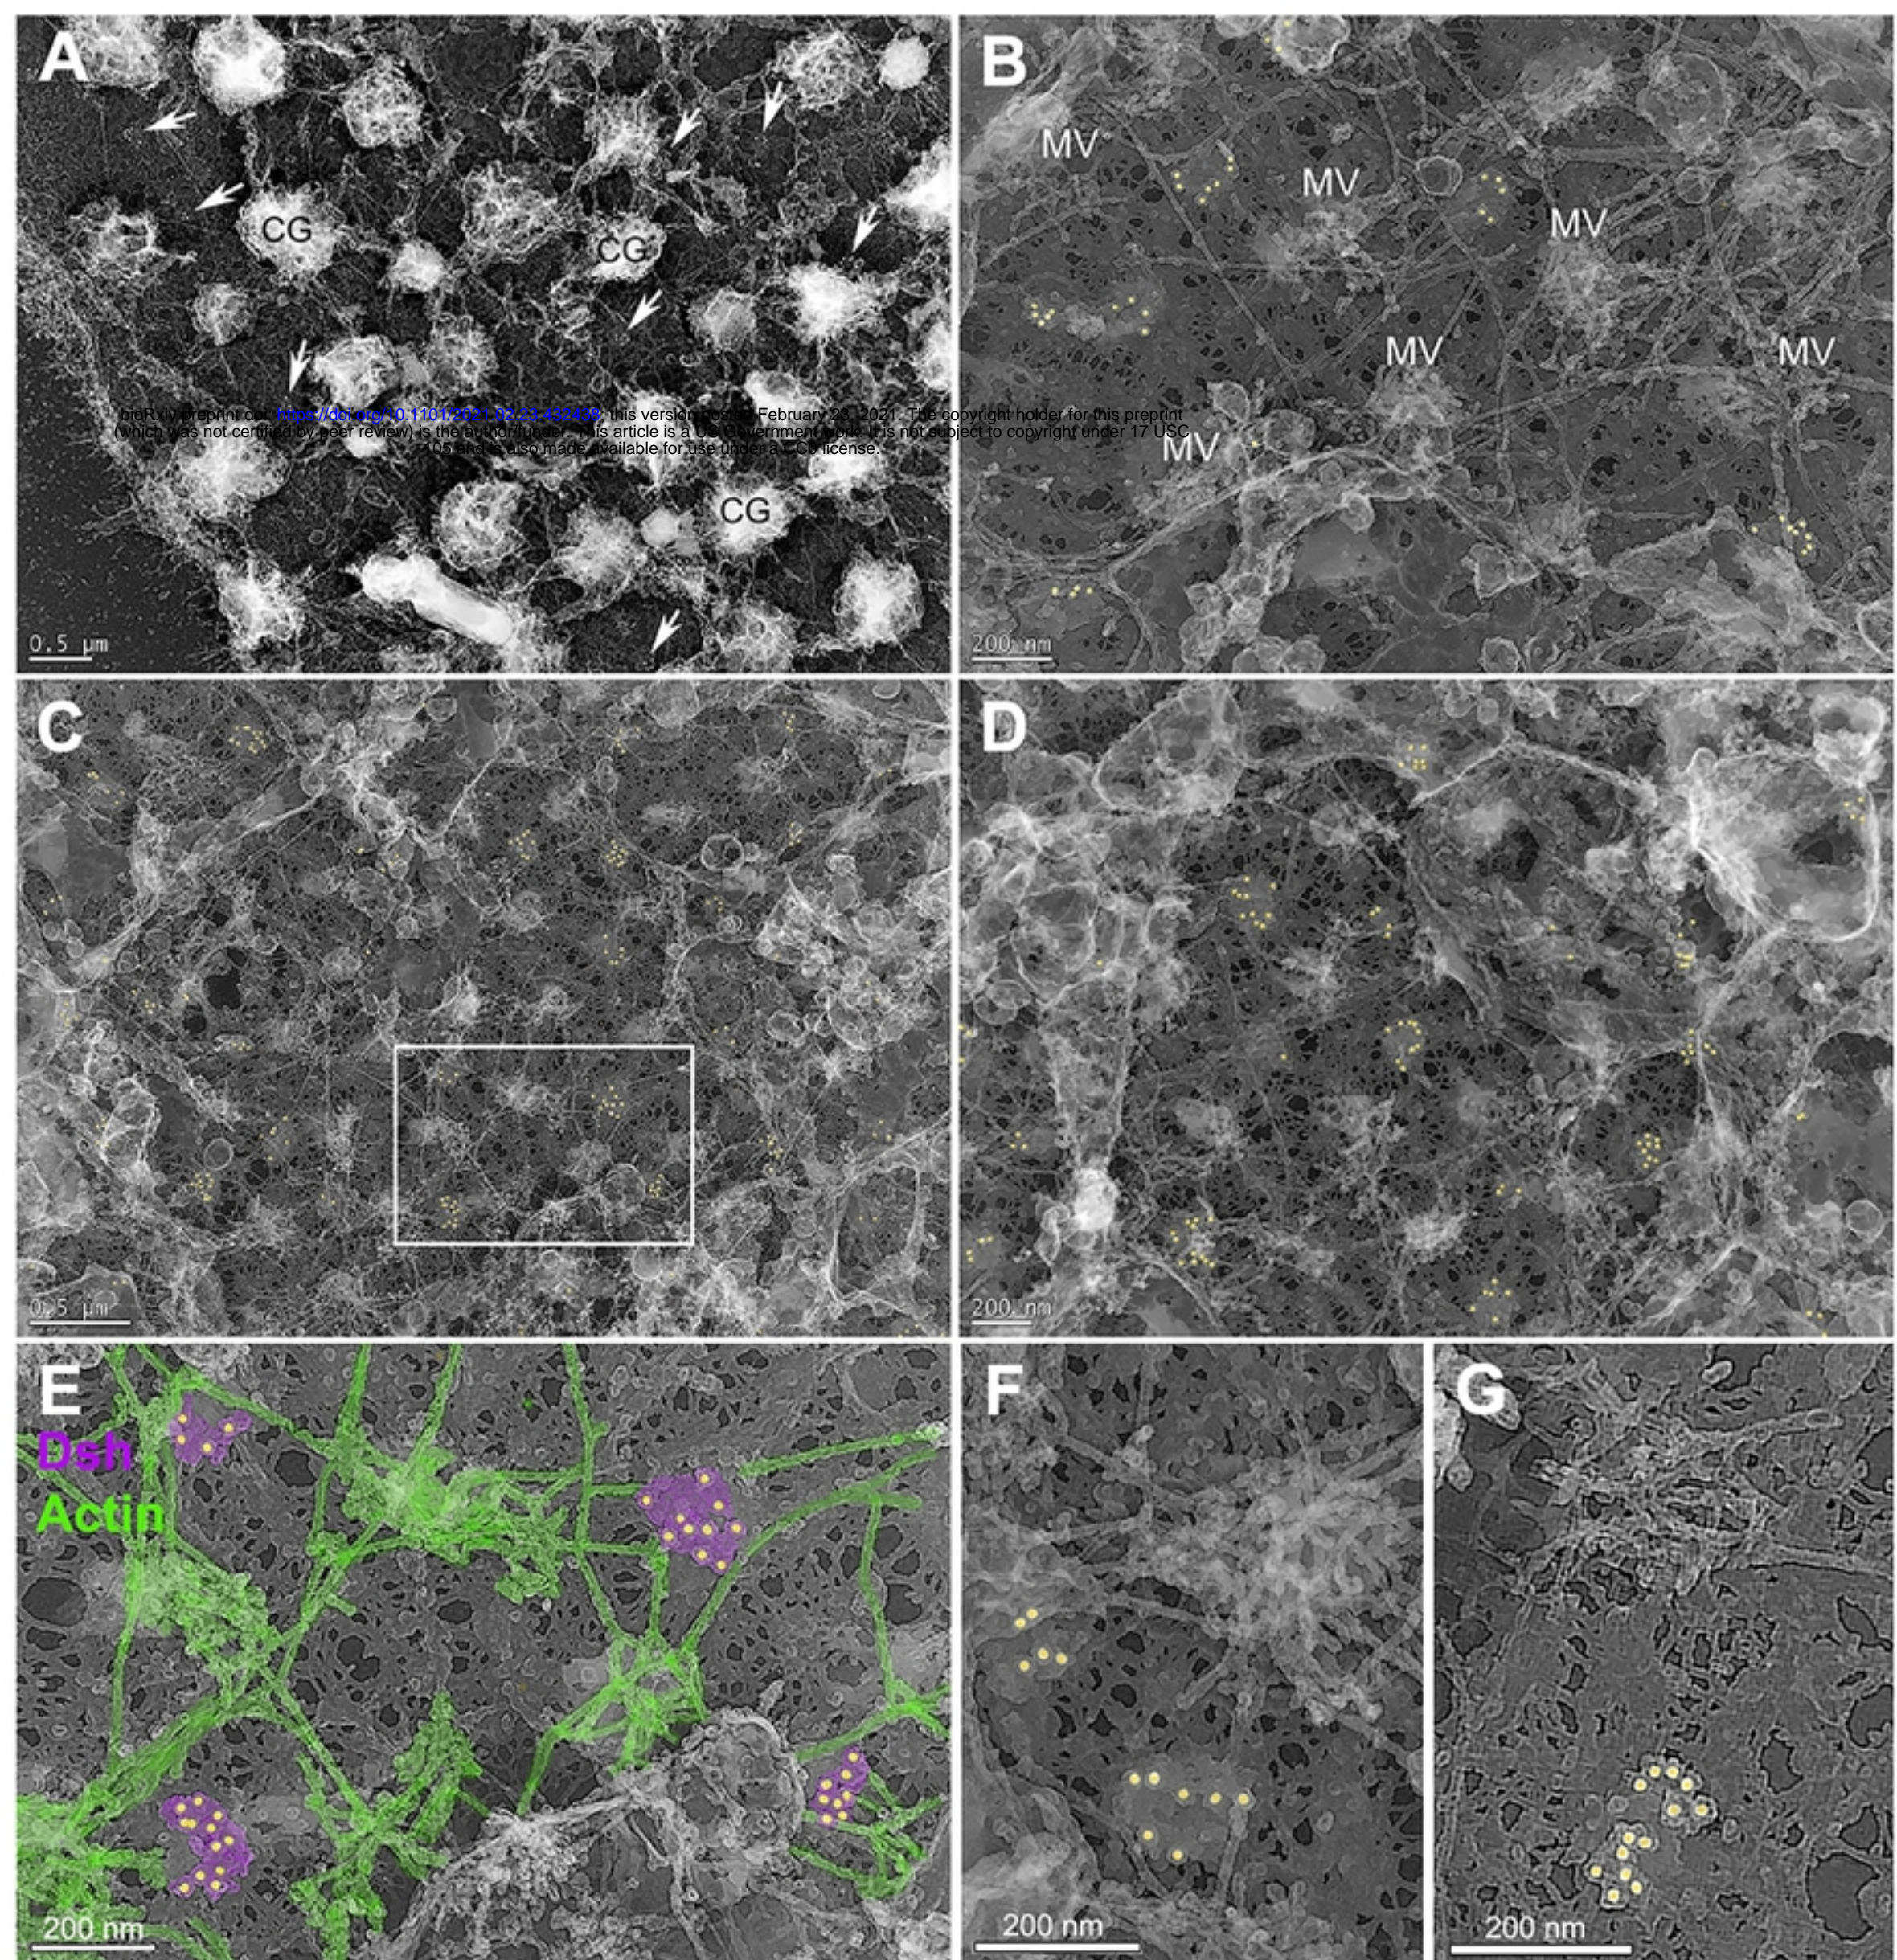

Figure 2



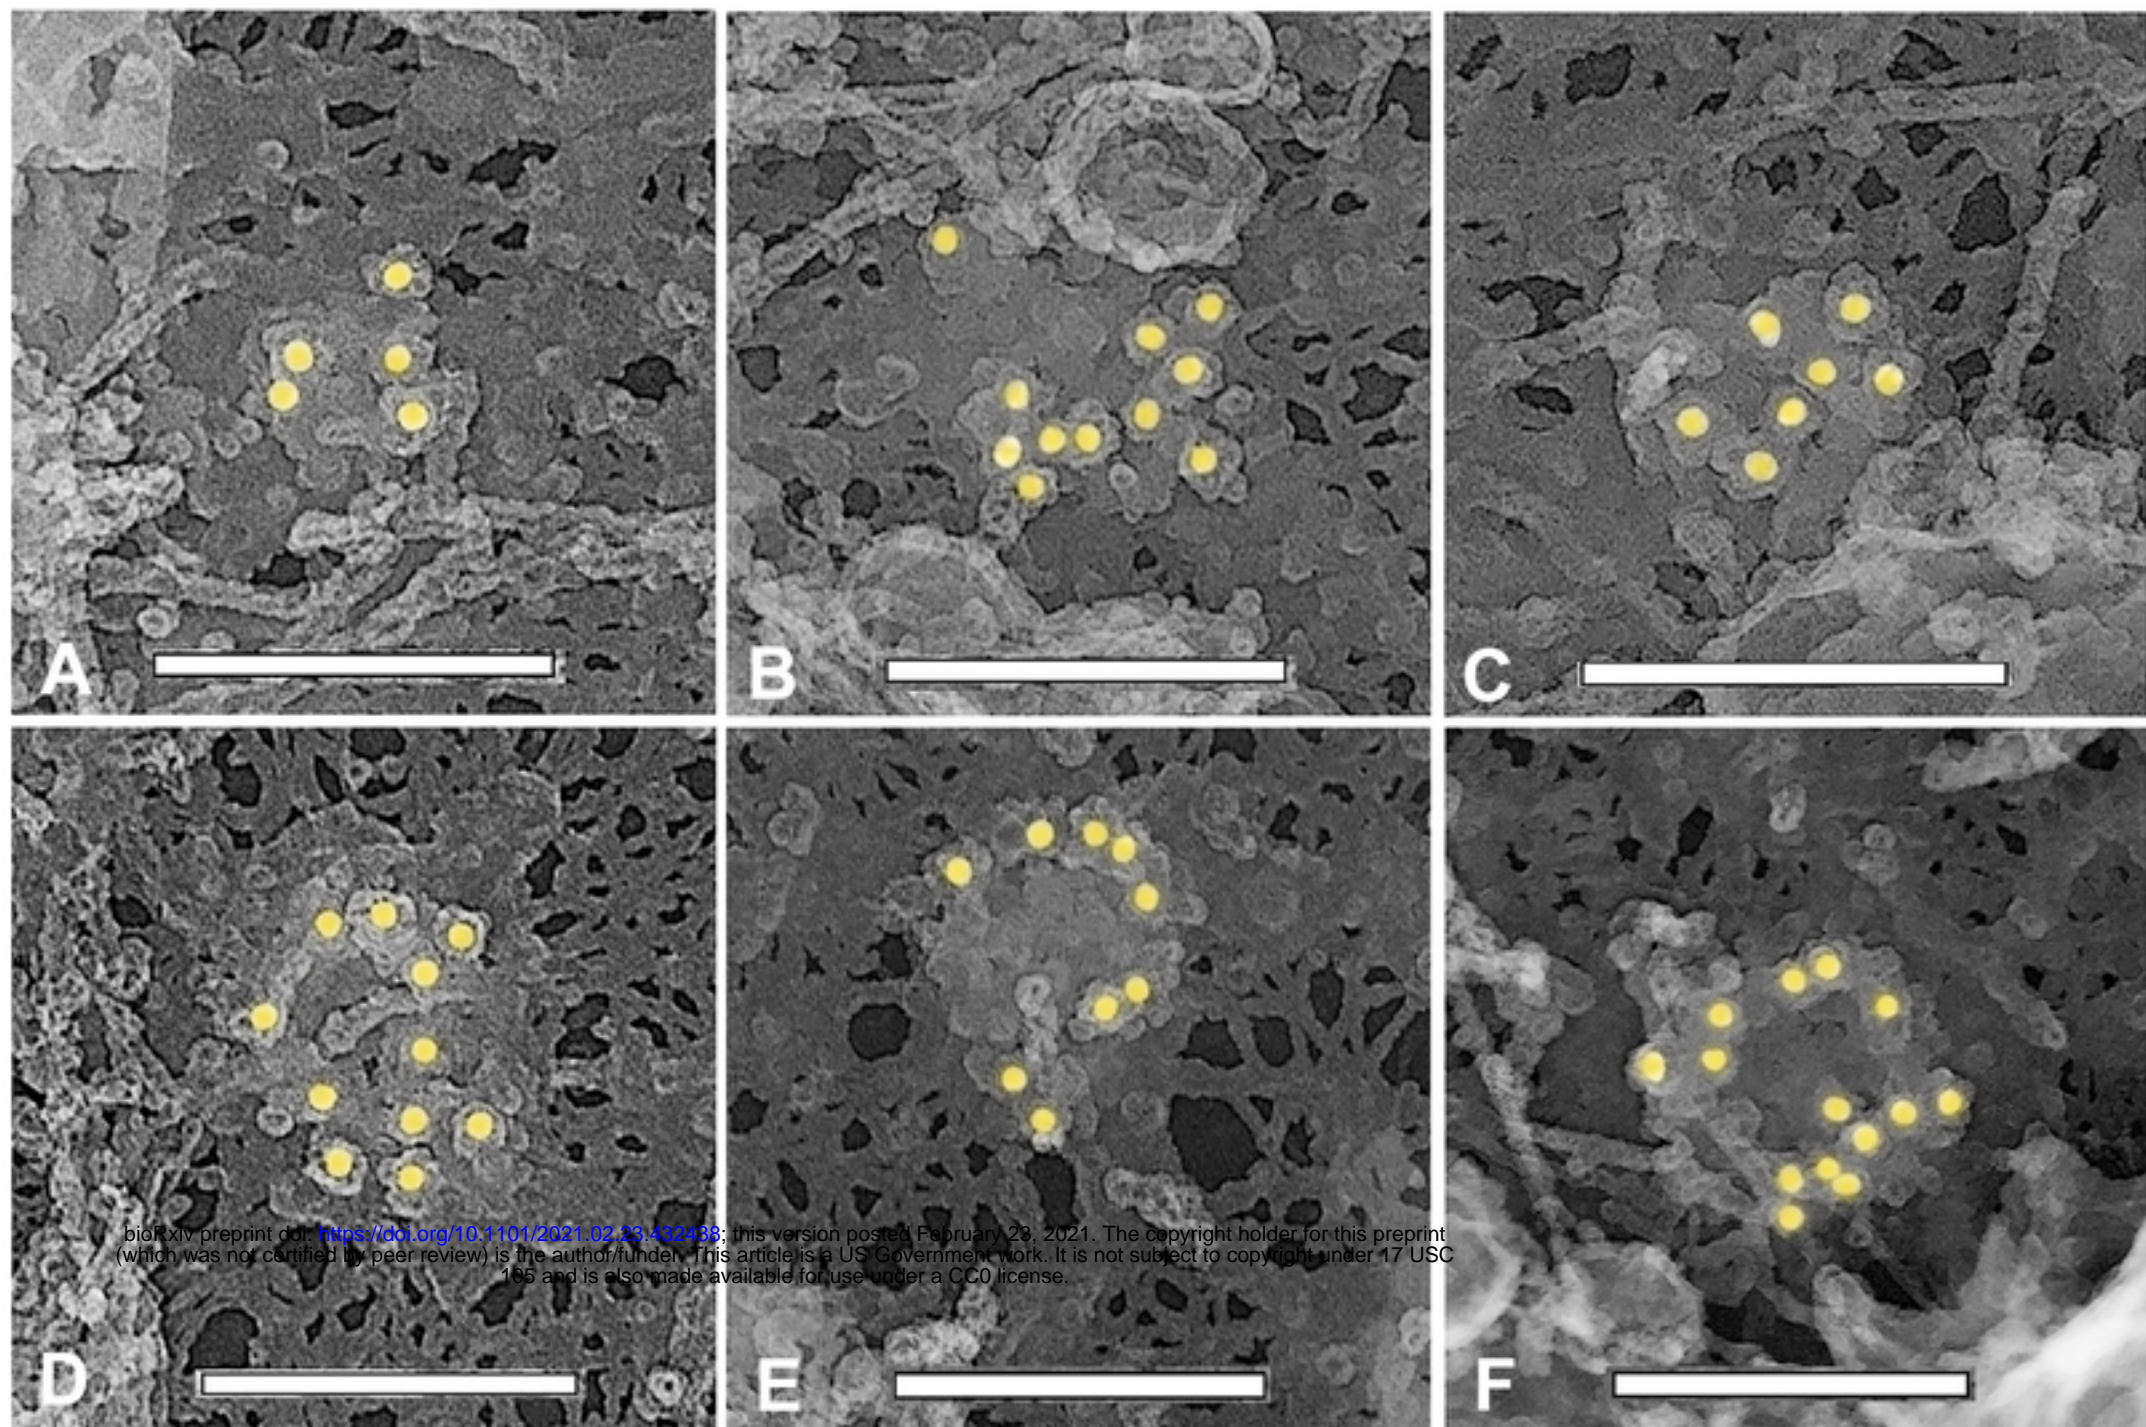

**Dsh Puncta Density LM & TEM**

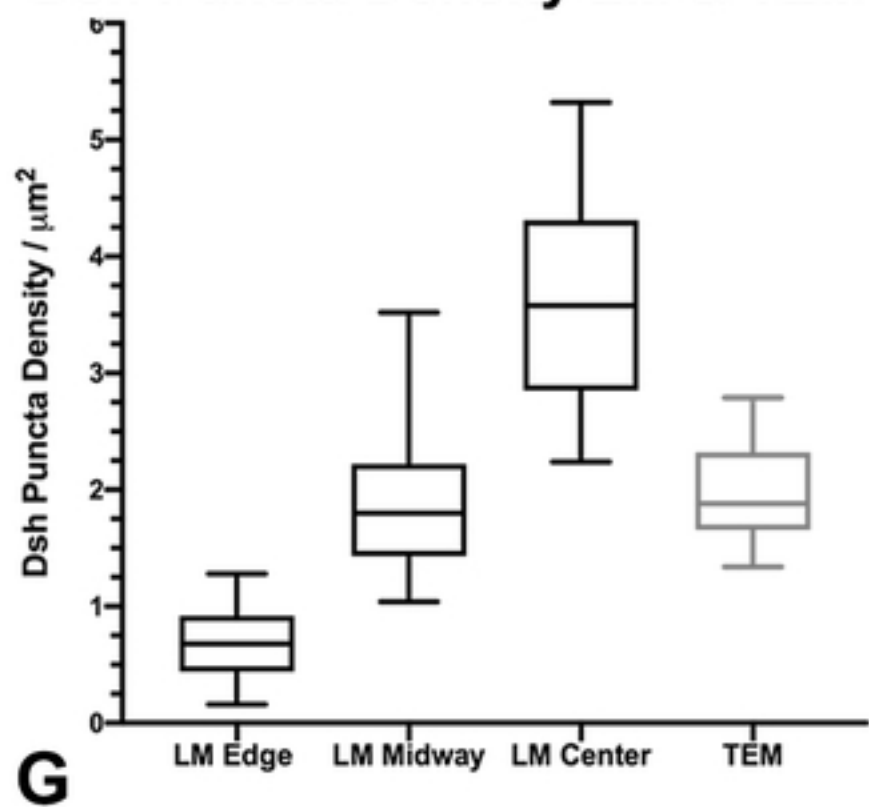

**Dsh Aggregate Area TEM**

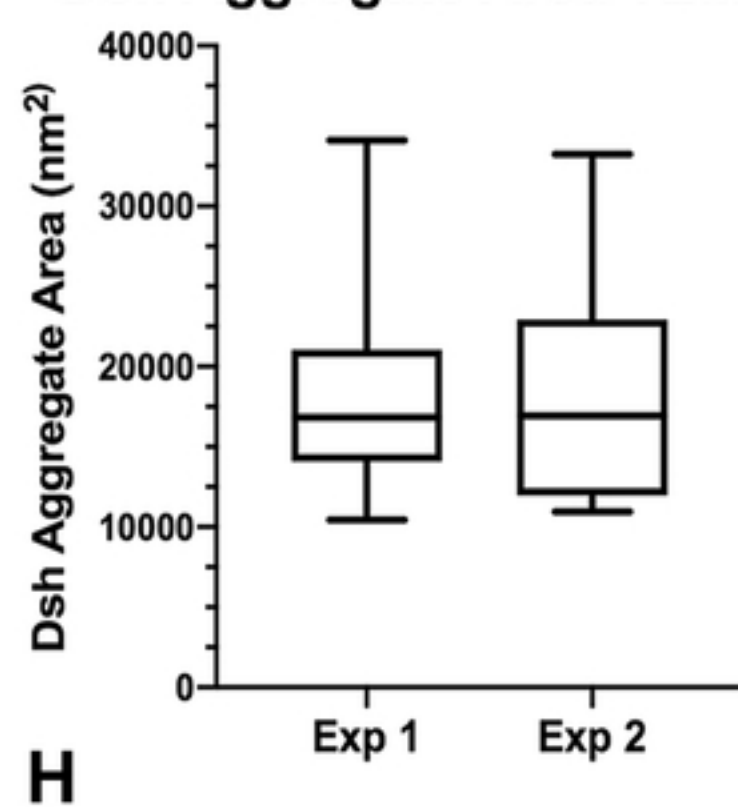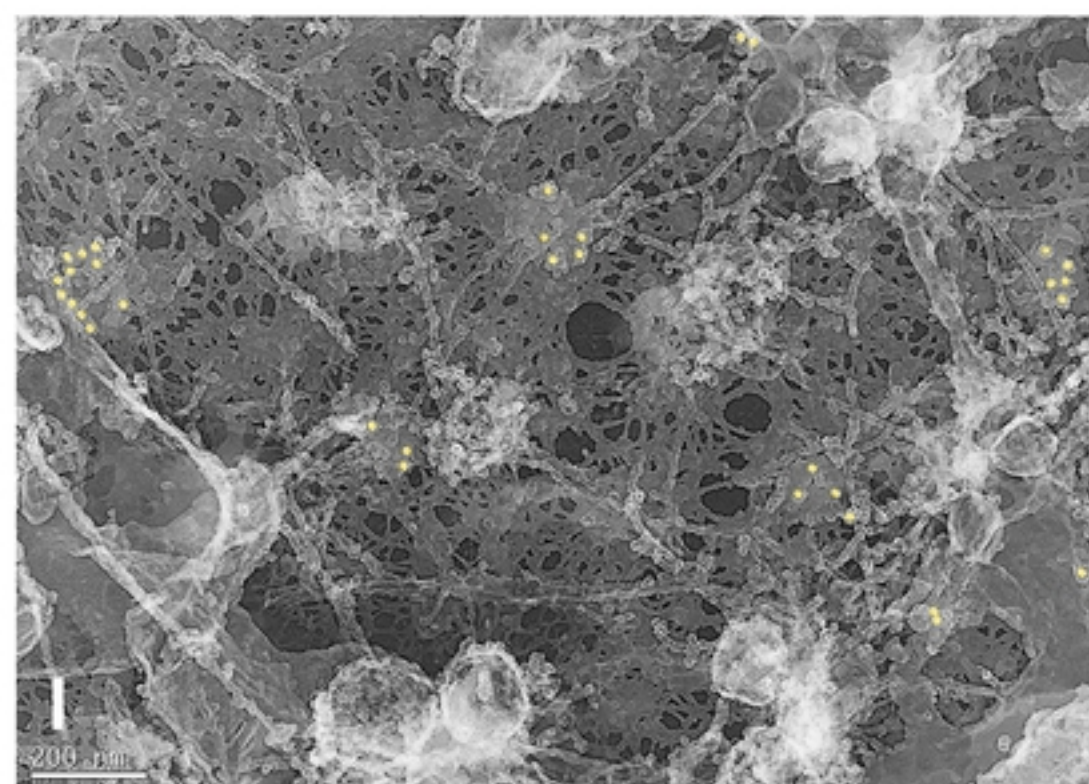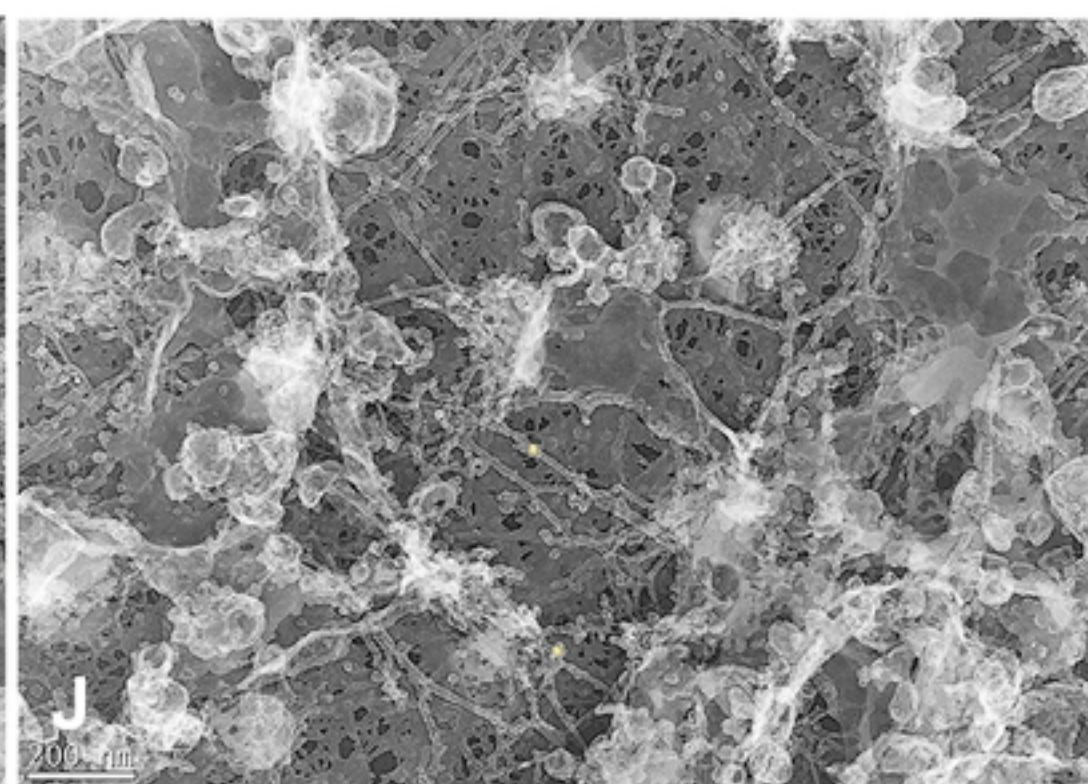

Figure 3



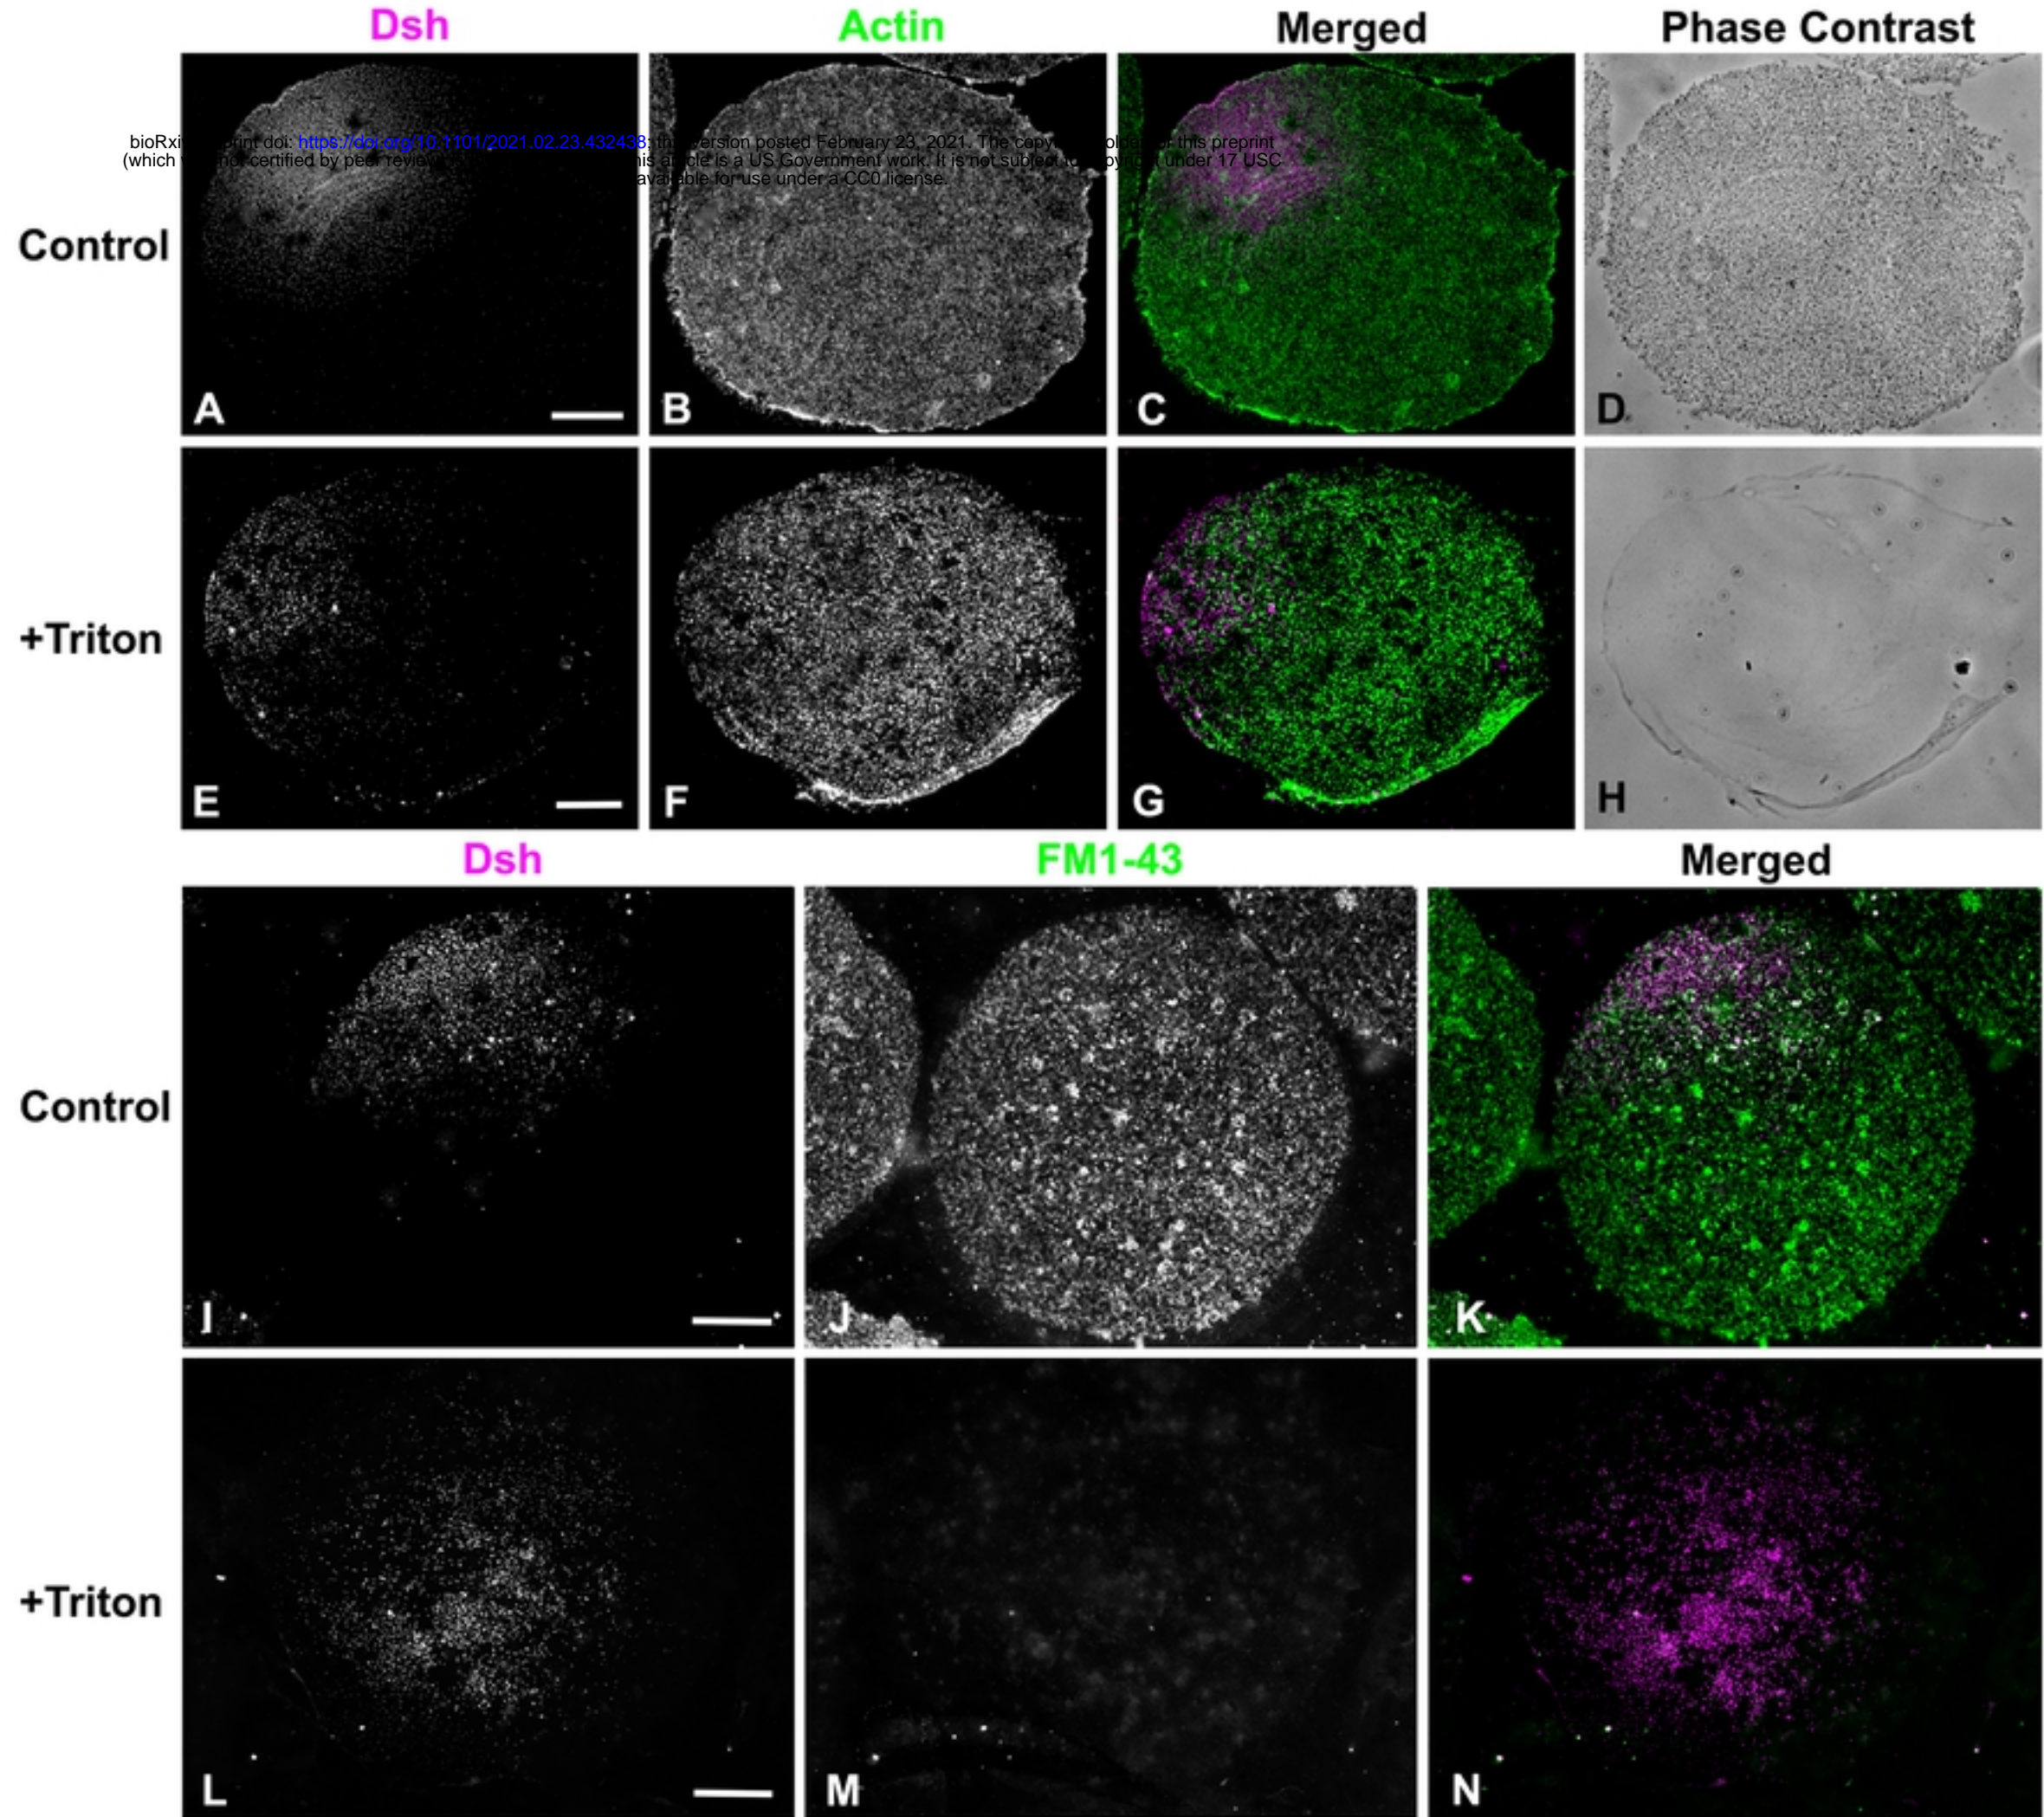



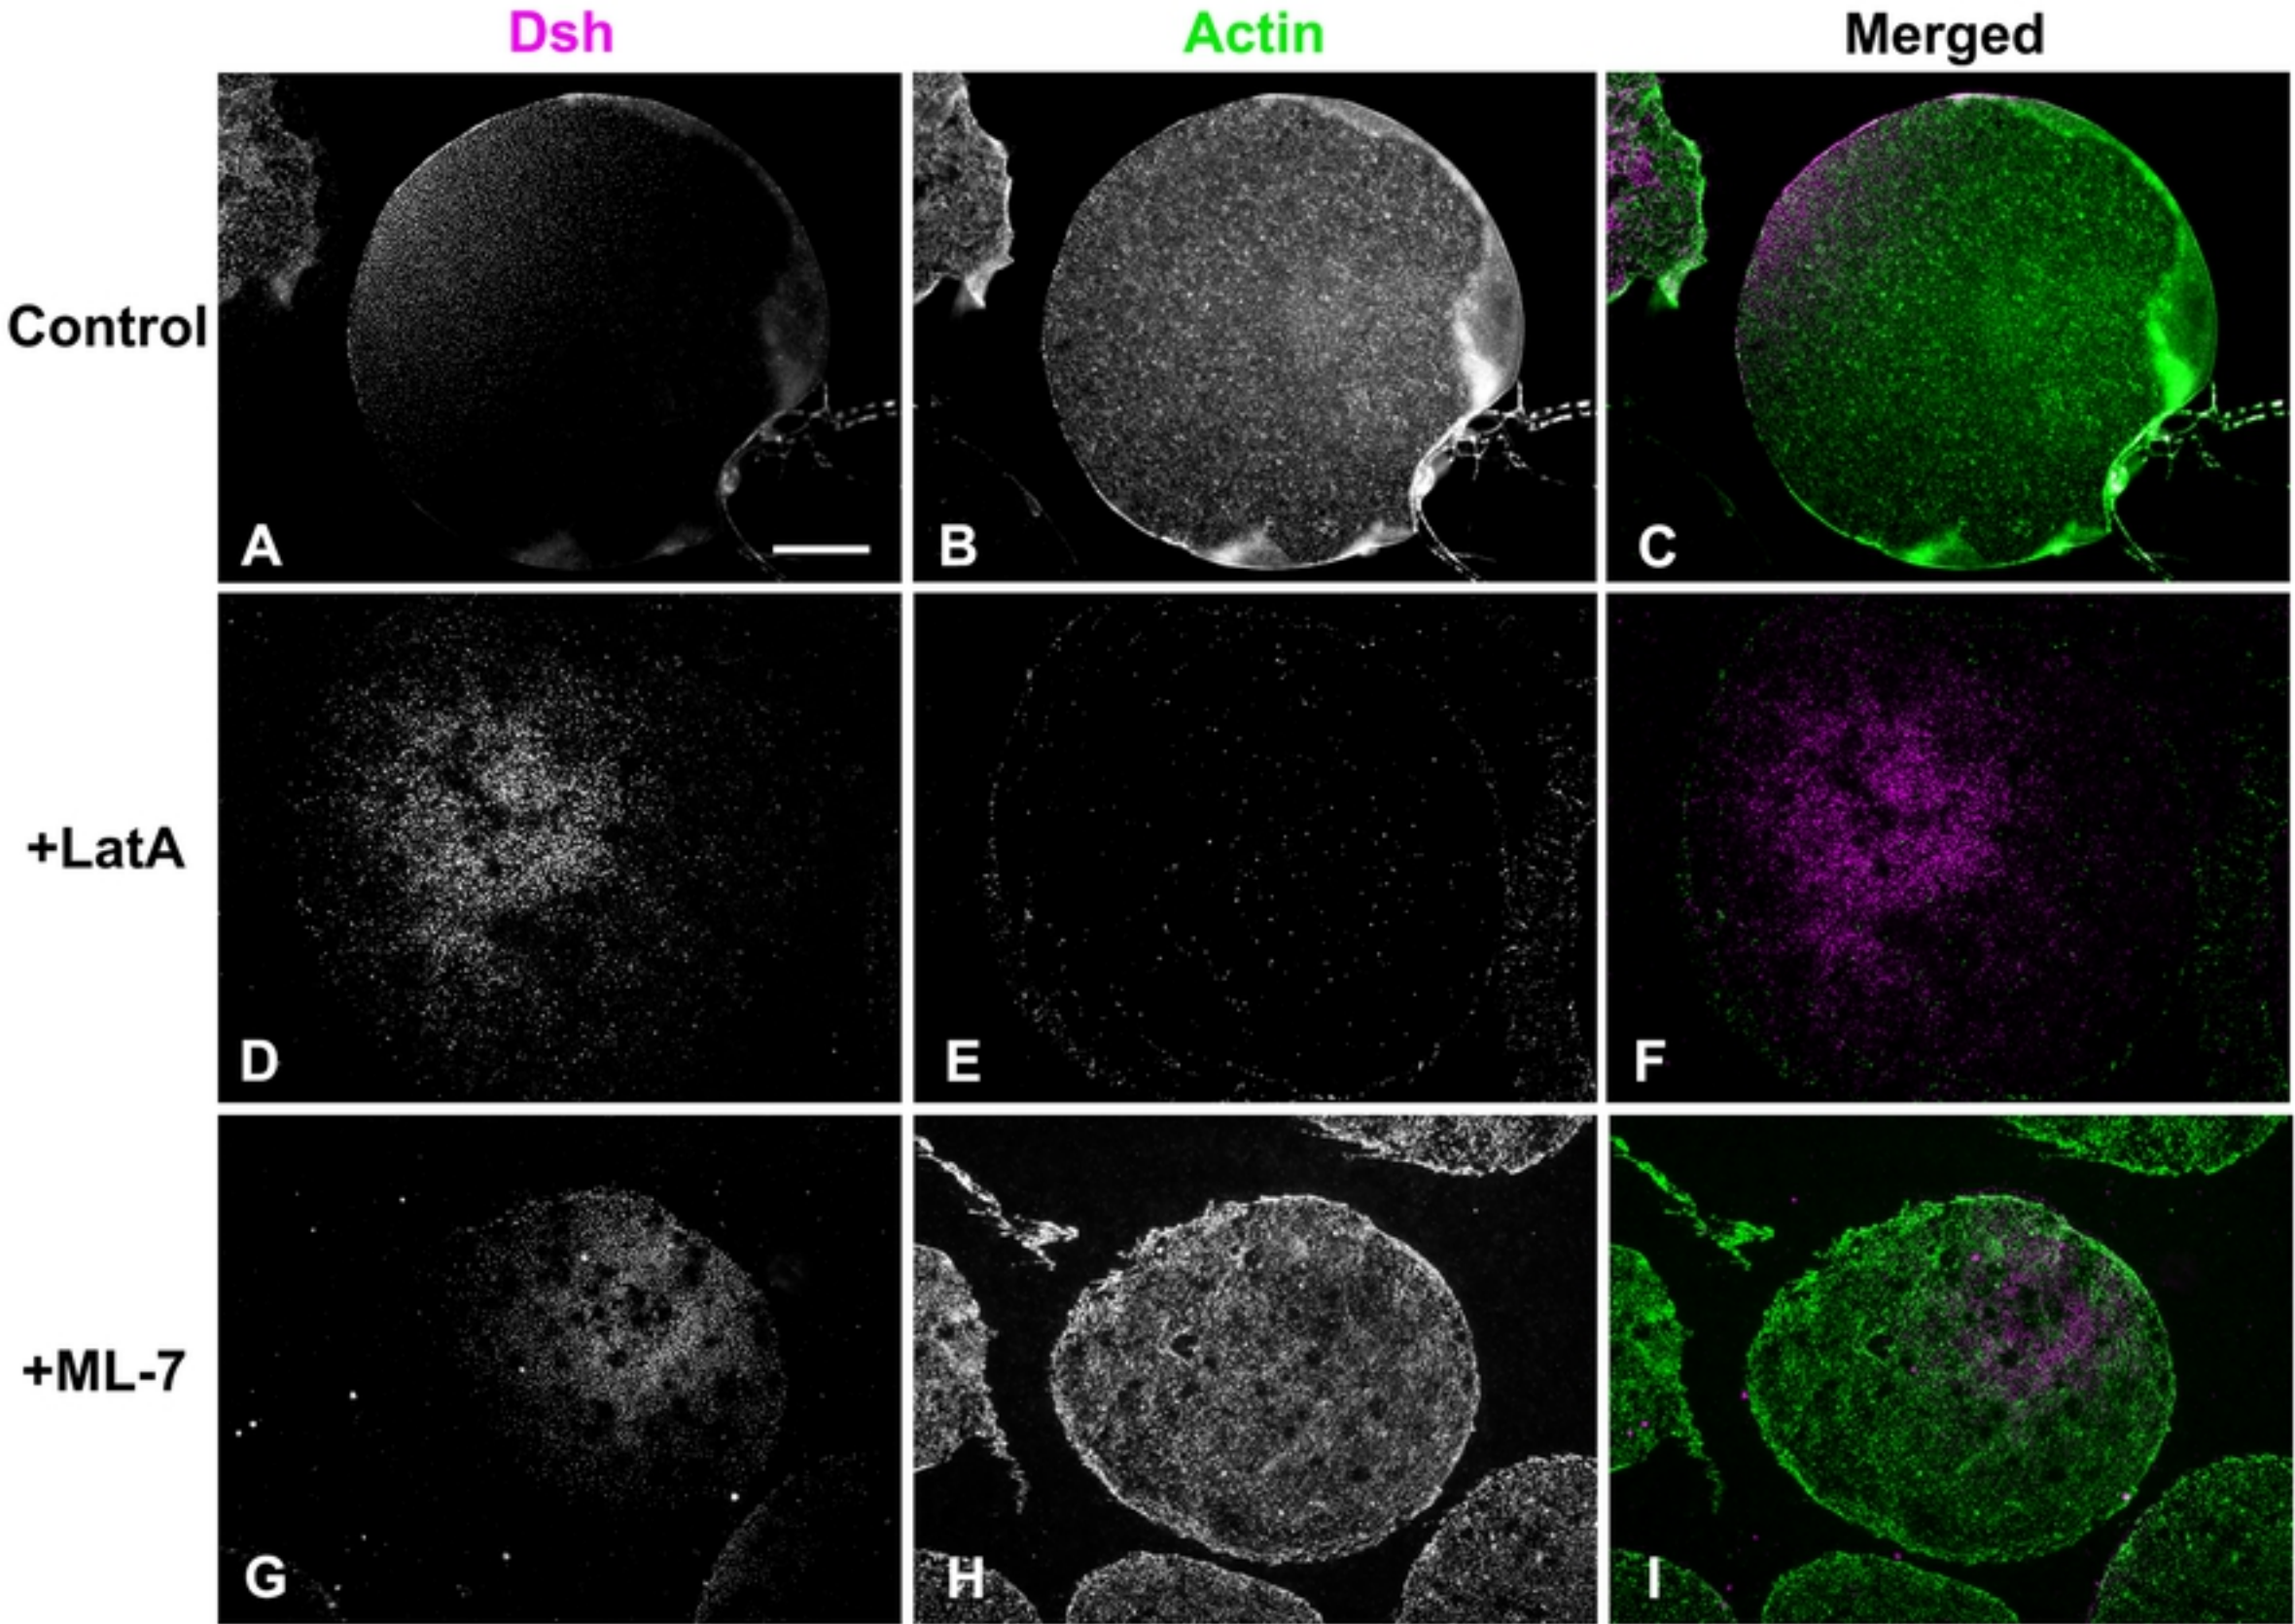

Figure 5



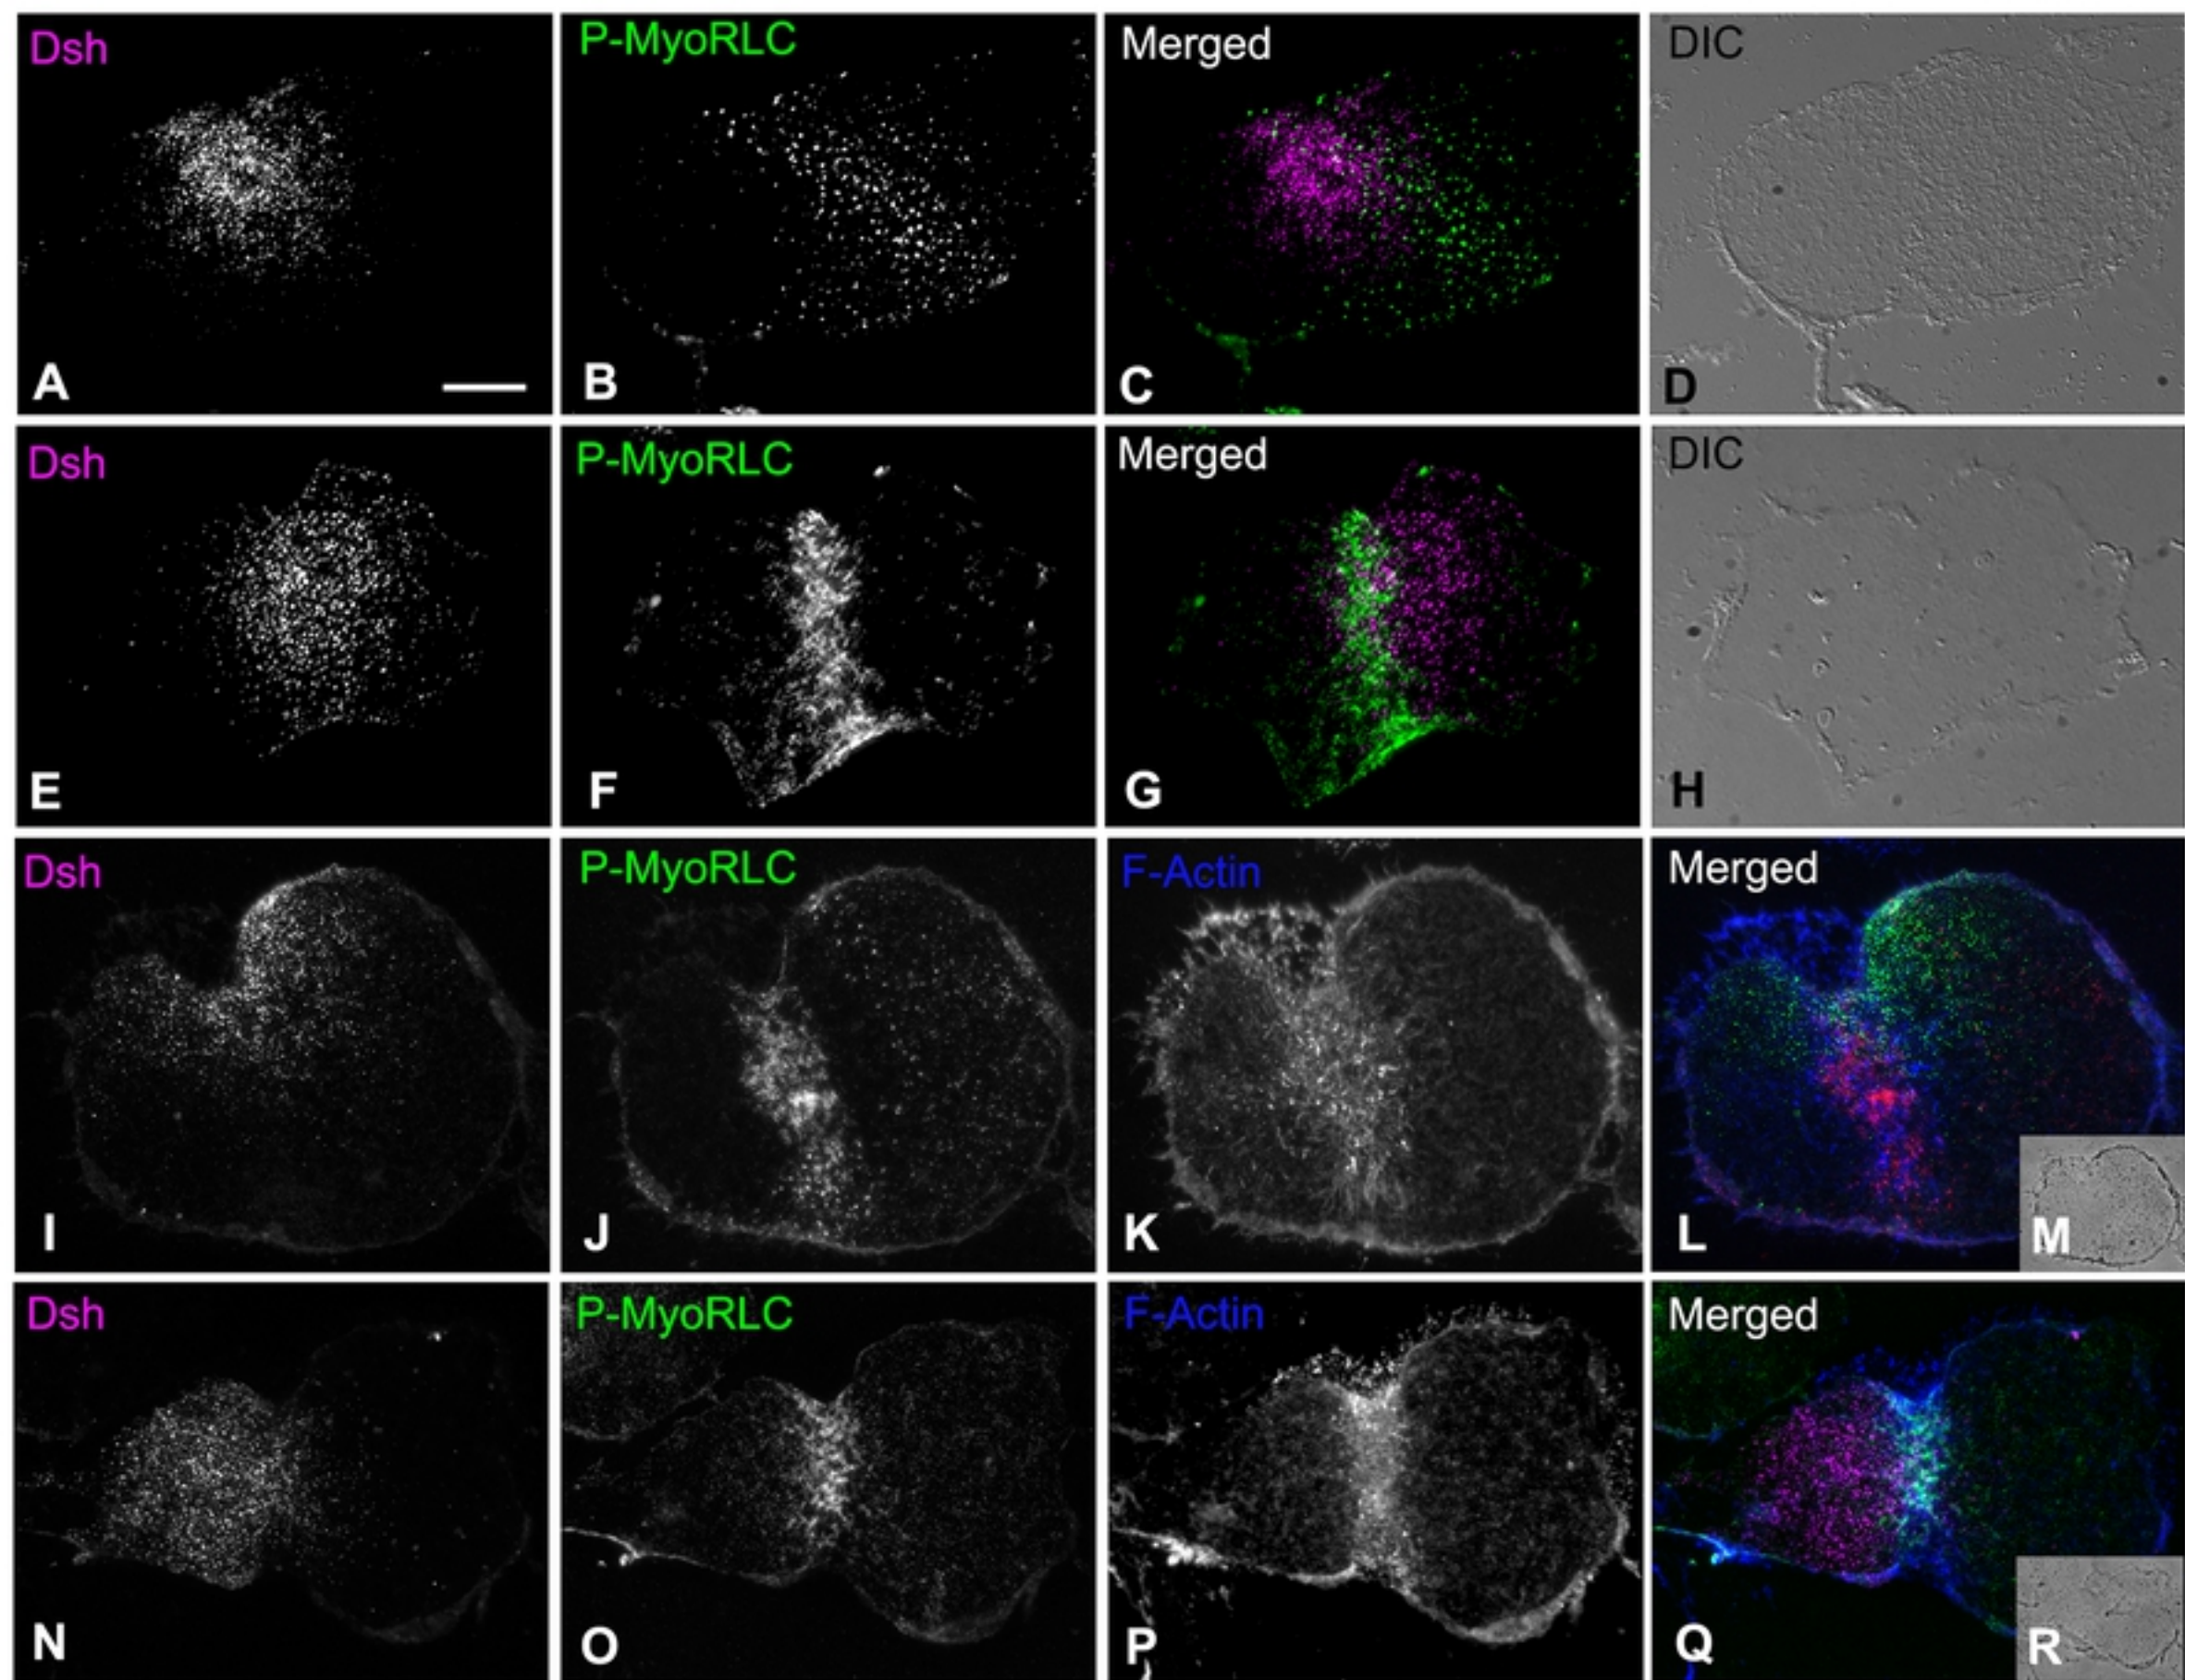

Figure 6
